# Supplementary material for: Construction and comprehensive analysis of a ceRNA network to reveal potential prognostic biomarkers for lung adenocarcinoma
Source: BMC Cancer. 2021 Jul 23;21:849. doi: 10.1186/s12885-021-08462-8 (PMC8299662; doi:10.1186/s12885-021-08462-8)
Supplement: Supplementary file 4 — Additional file 4. [file 12885_2021_8462_MOESM4_ESM.xlsx]

## Sheet: Table S4
Supplementary Table S4. Screening the differentially expressed mRNAs in TCGA-LUAD dataset.
ID	AveExpr	t	log2FC	P.Value	adj.P.Val
PYCR1	9.49978	27.5216	3.62485	1.31902e-34	2.29444e-30
C13orf36	5.0918	-27.2342	-6.35811	2.30169e-34	2.29444e-30
PTPRQ	4.2779	-26.3573	-4.95194	1.29907e-33	8.63322e-30
C10orf67	4.08168	-25.7741	-4.62077	4.22085e-33	2.10378e-29
RTKN2	9.99763	-24.8982	-4.65245	2.58629e-32	1.03126e-28
KANK3	7.85846	-24.7576	-3.07694	3.4769e-32	1.10671e-28
C13orf15	11.0762	-24.7049	-2.89392	3.88574e-32	1.10671e-28
FHL1	11.0199	-24.2042	-3.61312	1.12966e-31	2.42977e-28
ITLN2	5.44137	-24.1695	-7.04181	1.21726e-31	2.42977e-28
ACTN2	4.39467	-24.169	-3.71023	1.21873e-31	2.42977e-28
SH3GL3	4.07571	-23.9555	-4.97343	1.93277e-31	3.50305e-28
SGCG	4.40853	-23.568	-4.18591	4.50243e-31	7.48042e-28
RAMP2	9.37846	-22.7165	-2.83142	3.00791e-30	4.48326e-27
RS1	4.28803	-22.6955	-4.47298	3.15412e-30	4.48326e-27
LIMS2	9.58412	-22.6659	-2.84442	3.37307e-30	4.48326e-27
SFXN1	8.95859	22.5182	1.6585	4.71877e-30	5.87989e-27
PTPN21	9.67926	-22.4465	-2.47572	5.55866e-30	6.519e-27
FABP4	8.36308	-22.379	-5.9479	6.4864e-30	7.1844e-27
TAL1	6.90649	-22.3459	-2.8881	6.99798e-30	7.34309e-27
PECAM1	11.4556	-22.2288	-2.15437	9.15906e-30	9.1302e-27
WWC2	10.5066	-22.1833	-2.39991	1.01718e-29	9.65689e-27
CLEC3B	9.66966	-22.1473	-4.28326	1.10547e-29	1.00181e-26
EPAS1	14.0988	-21.8947	-2.67804	1.98654e-29	1.72199e-26
SLC6A4	6.88144	-21.8314	-8.00808	2.30304e-29	1.91315e-26
WNT3A	5.51903	-21.785	-5.25606	2.56709e-29	2.04721e-26
TEK	9.27758	-21.7621	-3.245	2.70857e-29	2.07695e-26
MYOC	3.88177	-21.4625	-4.65836	5.48484e-29	4.05005e-26
EDNRB	9.90337	-21.2948	-3.65076	8.16976e-29	5.76731e-26
IQSEC3	5.53342	-21.2837	-3.01805	8.38903e-29	5.76731e-26
CAV1	12.9887	-21.2011	-3.77881	1.02176e-28	6.79031e-26
NCKAP5	7.97011	-21.1502	-4.30417	1.154e-28	7.42168e-26
SRPK1	10.0791	21.1084	1.61565	1.27569e-28	7.81708e-26
ARHGAP6	7.28589	-21.1025	-2.63893	1.29389e-28	7.81708e-26
PRX	9.26466	-21.0783	-3.58178	1.37143e-28	8.04182e-26
GOLM1	11.2548	21.0493	2.62718	1.47032e-28	8.15939e-26
JAM2	7.85397	-21.0474	-2.40664	1.47693e-28	8.15939e-26
GRK5	9.61908	-21.0371	-2.63532	1.51426e-28	8.15939e-26
CD300LG	5.23811	-21.0216	-5.7036	1.57146e-28	8.2448e-26
TCF21	9.0009	-20.9512	-3.41376	1.86223e-28	9.30796e-26
SPOCK2	11.9123	-20.95	-3.55034	1.86747e-28	9.30796e-26
UPK3B	8.22552	-20.9044	-6.0491	2.08535e-28	1.01404e-25
BTNL9	7.7001	-20.7503	-4.4094	3.02949e-28	1.43807e-25
TGM1	5.78677	-20.7022	-3.34979	3.406e-28	1.57919e-25
ALDH18A1	10.3818	20.4373	1.71503	6.51357e-28	2.95139e-25
USHBP1	6.37853	-20.4038	-2.71427	7.07249e-28	3.13343e-25
CA4	6.34579	-20.3925	-6.16222	7.27321e-28	3.1523e-25
KL	7.00053	-20.3346	-3.15848	8.38828e-28	3.52181e-25
CHRNA2	2.34532	-20.3303	-3.32314	8.47906e-28	3.52181e-25
NECAB1	7.32746	-20.2849	-3.33064	9.4867e-28	3.85993e-25
C20orf160	7.04555	-20.1929	-2.66291	1.19155e-27	4.66717e-25
FOLR3	3.83147	-20.1921	-3.94024	1.19389e-27	4.66717e-25
NMUR1	5.39866	-20.1832	-2.99918	1.22059e-27	4.67981e-25
EMP2	13.5524	-20.0291	-2.93283	1.79143e-27	6.59291e-25
AGER	11.9502	-20.0269	-6.90283	1.8016e-27	6.59291e-25
NPR1	9.04889	-20.016	-3.02651	1.85133e-27	6.59291e-25
GYPE	4.72131	-20.0158	-3.51809	1.85185e-27	6.59291e-25
ST8SIA6	3.91527	-20.0044	-3.68488	1.90559e-27	6.66521e-25
CAV3	2.28559	-19.9458	-2.95671	2.20682e-27	7.58577e-25
S1PR1	10.3243	-19.9299	-2.64756	2.29653e-27	7.76034e-25
NME1	9.76337	19.9075	2.172	2.42888e-27	8.07077e-25
SGEF	9.34384	-19.7845	-3.02757	3.31007e-27	1.08185e-24
JPH4	5.6295	-19.7567	-2.83933	3.55026e-27	1.14164e-24
ARHGEF15	8.75689	-19.724	-2.42077	3.85564e-27	1.22016e-24
OVCH2	2.38108	-19.714	-3.1662	3.95424e-27	1.23181e-24
TUBB3	8.73053	19.6891	4.20199	4.2117e-27	1.29183e-24
LOC158376	5.30195	-19.6738	-2.62927	4.3781e-27	1.32252e-24
HSPA12B	8.09386	-19.6571	-2.73518	4.56679e-27	1.35893e-24
GRIA1	6.14652	-19.6293	-4.98837	4.89968e-27	1.43654e-24
DENND3	10.3876	-19.5518	-2.13993	5.96615e-27	1.72387e-24
FAM189A2	8.72705	-19.53	-3.65547	6.30677e-27	1.79626e-24
CNTN6	5.57647	-19.4892	-5.32693	6.99751e-27	1.96492e-24
ACVRL1	10.592	-19.4521	-2.4031	7.69134e-27	2.10416e-24
FAM83A	7.12807	19.4515	6.42927	7.70446e-27	2.10416e-24
GRASP	8.10369	-19.422	-2.46292	8.30763e-27	2.20839e-24
PAICS	10.3557	19.3905	1.75934	9.00295e-27	2.36173e-24
STX11	9.16658	-19.3566	-3.17056	9.81944e-27	2.52038e-24
RAMP3	9.30768	-19.355	-3.2679	9.86055e-27	2.52038e-24
STXBP6	6.46657	-19.3207	-3.87297	1.0768e-26	2.71749e-24
FERMT1	7.38338	19.2819	3.16833	1.18958e-26	2.96178e-24
ATIC	10.3721	19.2772	1.28593	1.204e-26	2.96178e-24
GPM6A	7.55775	-19.2726	-5.31635	1.21817e-26	2.96178e-24
C13orf1	8.70528	-19.2477	-1.32286	1.29868e-26	3.07753e-24
INMT	10.573	-19.2461	-3.90657	1.30428e-26	3.07753e-24
PTPRB	10.7803	-19.2438	-2.76711	1.31208e-26	3.07753e-24
CD5L	3.34595	-19.237	-4.04072	1.33498e-26	3.09482e-24
OTUD1	9.55616	-19.194	-2.05622	1.49148e-26	3.41789e-24
EMCN	9.10546	-19.1402	-2.84331	1.71375e-26	3.88261e-24
RASIP1	8.67556	-19.1017	-2.42594	1.89318e-26	4.21234e-24
RSPO1	4.97429	-19.1	-3.70515	1.90154e-26	4.21234e-24
ANGPT4	3.12531	-19.0919	-3.87644	1.94188e-26	4.25442e-24
CCDC48	7.11103	-19.0804	-3.21106	2.00031e-26	4.3348e-24
LDB2	9.4134	-19.069	-2.51378	2.06043e-26	4.41708e-24
HIGD1B	6.24629	-18.9643	-2.85722	2.70375e-26	5.73454e-24
THBD	10.926	-18.9321	-2.26397	2.94015e-26	6.1703e-24
GPIHBP1	7.71403	-18.9201	-4.1355	3.03333e-26	6.29952e-24
CAV2	11.8818	-18.9002	-2.51182	3.19519e-26	6.56727e-24
CDH5	11.1121	-18.8558	-2.37942	3.5878e-26	7.29897e-24
PRKCE	9.14831	-18.8421	-1.95256	3.7188e-26	7.48907e-24
PPP1R14B	9.77008	18.8308	1.91171	3.82958e-26	7.63504e-24
ETV4	7.49869	18.801	3.40844	4.14087e-26	8.17391e-24
MYCT1	8.4572	-18.7781	-2.12554	4.39648e-26	8.5934e-24
OVCH1	3.19709	-18.7666	-4.28136	4.53161e-26	8.77152e-24
SASH1	10.2502	-18.7565	-1.84321	4.65324e-26	8.87706e-24
KIF26B	7.11169	18.7487	3.33361	4.74834e-26	8.87706e-24
RCC1	8.96566	18.7487	2.08062	4.74841e-26	8.87706e-24
FMO2	10.837	-18.7475	-3.33282	4.76423e-26	8.87706e-24
GPR146	7.81035	-18.7167	-2.31852	5.16561e-26	9.53581e-24
TMEM88	5.95445	-18.7074	-2.60617	5.29263e-26	9.68066e-24
ANGPTL7	3.53645	-18.6048	-4.29353	6.93314e-26	1.2566e-23
MMP11	7.74228	18.5456	5.48895	8.10739e-26	1.45619e-23
FAM107A	9.78313	-18.5158	-4.52106	8.77179e-26	1.56146e-23
RASAL1	4.71908	18.5019	3.94729	9.10211e-26	1.60592e-23
SDPR	11.2624	-18.4399	-3.37681	1.07282e-25	1.87621e-23
PAK1	10.2412	18.415	1.25269	1.14608e-25	1.98691e-23
MDK	10.832	18.4088	2.6012	1.16504e-25	2.00236e-23
ROBO4	10.0767	-18.4043	-2.64485	1.17916e-25	2.00931e-23
PNPLA6	11.0923	-18.3998	-1.55077	1.1934e-25	2.01633e-23
RPL13AP17	5.09539	-18.3888	-5.13919	1.22881e-25	2.05872e-23
BCL2L2	10.1592	-18.3839	-1.14852	1.24482e-25	2.06816e-23
CLIC5	10.8092	-18.3685	-4.53376	1.29691e-25	2.12394e-23
C8orf84	6.90656	-18.3653	-3.26487	1.30802e-25	2.12394e-23
SLCO1A2	4.56721	-18.3646	-5.1828	1.31035e-25	2.12394e-23
PHKA1	8.07829	18.3129	1.71527	1.50431e-25	2.41866e-23
ADRB2	8.04849	-18.2998	-3.42783	1.55766e-25	2.4844e-23
ST6GALNAC6	10.7996	-18.2951	-1.45722	1.57717e-25	2.49361e-23
CCDC85A	7.20959	-18.2925	-3.32732	1.58845e-25	2.49361e-23
TNNC1	7.9504	-18.2495	-4.98121	1.78176e-25	2.77524e-23
MGAT3	8.53811	-18.2173	-3.82804	1.94225e-25	3.00175e-23
SLC6A13	3.06988	-18.2084	-3.31134	1.98905e-25	3.04358e-23
GCOM1	8.51088	-18.1924	-3.49881	2.07629e-25	3.13598e-23
CYP3A7	3.12797	-18.1677	-3.55517	2.21803e-25	3.32487e-23
SCUBE1	6.46311	-18.1578	-4.58853	2.27826e-25	3.38967e-23
B3GNT3	7.2078	18.1413	4.17556	2.38089e-25	3.51614e-23
LOC149620	4.64662	-18.1181	-5.53385	2.53416e-25	3.71497e-23
CALCOCO1	11.0254	-18.1013	-1.46713	2.65141e-25	3.85848e-23
FAM46B	8.11886	-18.082	-2.97611	2.79276e-25	4.03472e-23
ECSCR	7.2077	-18.0383	-2.25959	3.14223e-25	4.50695e-23
KIF1C	11.9332	-18.0251	-1.44364	3.25568e-25	4.63633e-23
FAM150B	4.781	-18.0105	-3.82563	3.38695e-25	4.78905e-23
CAT	11.7684	-18.0073	-2.03501	3.41633e-25	4.79658e-23
CALCRL	10.5994	-17.9817	-2.55423	3.66101e-25	5.10416e-23
ADM2	6.39109	17.979	3.27332	3.68736e-25	5.1052e-23
SLC19A3	7.16565	-17.9307	-3.67622	4.20259e-25	5.77842e-23
ZFP106	11.0773	-17.8843	-1.33615	4.76521e-25	6.50713e-23
CLDN5	10.0229	-17.876	-2.87872	4.87425e-25	6.61074e-23
CBX7	10.0881	-17.8657	-1.82892	5.01149e-25	6.75094e-23
ACADL	6.6884	-17.861	-4.54977	5.07687e-25	6.79312e-23
ADRA1A	3.0513	-17.8457	-3.56785	5.29231e-25	7.00196e-23
EPCAM	12.3348	17.8449	1.4022	5.30319e-25	7.00196e-23
GDF10	7.12796	-17.8416	-4.02296	5.35137e-25	7.01909e-23
PLEKHN1	4.96135	17.8216	3.24348	5.6502e-25	7.36262e-23
SH2D4B	3.17436	-17.8182	-2.54207	5.70272e-25	7.3828e-23
UBE2T	6.52979	17.7948	3.20532	6.07747e-25	7.81719e-23
PCDH15	3.93941	-17.7891	-4.05699	6.17352e-25	7.88983e-23
SH2D3C	9.50856	-17.7736	-2.23401	6.43951e-25	8.17735e-23
KCNA4	3.63899	-17.7703	-4.15437	6.49751e-25	8.19879e-23
C16orf59	4.68691	17.7449	3.26551	6.96353e-25	8.73157e-23
AOC3	11.6065	-17.7154	-2.46452	7.54643e-25	9.3628e-23
ANGPTL1	6.57126	-17.7147	-2.92065	7.56087e-25	9.3628e-23
C20orf202	3.85406	-17.7051	-2.50339	7.76231e-25	9.55291e-23
CYYR1	9.08221	-17.6966	-2.04942	7.94572e-25	9.71863e-23
RXFP1	4.59902	-17.6784	-3.67301	8.3493e-25	1.015e-22
PPAT	7.65585	17.6199	1.88764	9.8003e-25	1.18417e-22
PLAC9	7.0611	-17.61	-3.11995	1.00718e-24	1.20308e-22
TRHDE	4.97455	-17.6098	-4.13329	1.00775e-24	1.20308e-22
PSAT1	7.10022	17.5613	3.367	1.1512e-24	1.36615e-22
LRRC36	6.54274	-17.5589	-4.36872	1.1588e-24	1.36704e-22
ERG	9.39781	-17.555	-2.01214	1.17117e-24	1.3735e-22
RILPL2	9.39091	-17.4767	-1.31671	1.45288e-24	1.69392e-22
OCIAD2	9.93554	17.4599	2.05911	1.52186e-24	1.76403e-22
DAPK2	9.0999	-17.4449	-2.59939	1.58623e-24	1.82801e-22
FOXF1	8.55402	-17.4422	-2.56758	1.598e-24	1.831e-22
CDC25C	4.06923	17.4063	3.88177	1.76476e-24	2.01052e-22
CLEC14A	10.028	-17.4009	-2.21303	1.79143e-24	2.02749e-22
SLC5A9	5.44527	-17.3991	-4.04074	1.8e-24	2.02749e-22
STARD13	9.13008	-17.3765	-1.94244	1.91617e-24	2.141e-22
GPD1	7.75288	-17.3737	-5.07947	1.93114e-24	2.141e-22
GRIK4	3.69076	-17.3734	-3.02836	1.93299e-24	2.141e-22
CYP1A2	2.65156	-17.3598	-3.8934	2.00708e-24	2.21079e-22
PAFAH1B3	8.40077	17.3431	1.99072	2.10241e-24	2.30307e-22
KAL1	10.7584	-17.317	-2.84063	2.26008e-24	2.46225e-22
C2orf71	3.21644	-17.2648	-3.83946	2.6129e-24	2.81586e-22
COX4I2	6.90522	-17.2542	-2.64541	2.69106e-24	2.8845e-22
KCNT2	5.85147	-17.2244	-3.42548	2.92327e-24	3.11665e-22
THSD1	7.43434	-17.1924	-2.2553	3.19628e-24	3.38959e-22
PKNOX2	7.06628	-17.1892	-2.63855	3.22517e-24	3.40213e-22
MRPL3	10.3796	17.1829	1.08104	3.2818e-24	3.44365e-22
GINS2	6.12438	17.1165	2.75623	3.95045e-24	4.12357e-22
CGNL1	10.4443	-17.1121	-2.58511	4.00013e-24	4.15367e-22
NRG3	3.29457	-17.0913	-3.12585	4.23971e-24	4.37964e-22
FGD5	9.83934	-17.0812	-2.10438	4.36154e-24	4.48227e-22
C9orf140	6.53101	17.0724	3.39977	4.47029e-24	4.57047e-22
SYT15	8.38271	-17.0409	-3.63927	4.88212e-24	4.96607e-22
LGR4	8.99131	16.9804	2.60697	5.78723e-24	5.85686e-22
CD36	10.1926	-16.9466	-3.4255	6.36411e-24	6.40815e-22
PDK4	10.663	-16.9198	-2.66533	6.86274e-24	6.8755e-22
PALM2-AKAP2	11.2597	-16.8897	-2.23059	7.47073e-24	7.44719e-22
KIF20A	6.62912	16.8812	3.53182	7.65197e-24	7.58992e-22
HMMR	6.34213	16.8777	3.3206	7.72916e-24	7.62853e-22
PDIA4	12.3638	16.8574	1.74003	8.18417e-24	8.03782e-22
ERCC6L	4.90651	16.8426	2.99435	8.53384e-24	8.34016e-22
TMEM177	6.92638	16.835	1.48977	8.7196e-24	8.44084e-22
UBE2C	6.86375	16.8349	3.77961	8.72154e-24	8.44084e-22
TOP2A	8.97727	16.8084	3.844	9.40211e-24	9.04703e-22
NLN	8.09135	16.807	1.73299	9.43864e-24	9.04703e-22
DACH1	7.11525	-16.8033	-2.79254	9.53872e-24	9.09921e-22
GPT2	8.40124	16.7987	2.67919	9.66374e-24	9.17457e-22
SEMA3G	8.63696	-16.7868	-3.10352	9.9951e-24	9.44419e-22
SGPL1	10.7313	16.7439	1.0077	1.12875e-23	1.06151e-21
EPM2A	6.98389	-16.742	-1.07476	1.135e-23	1.06237e-21
E2F8	5.23065	16.7175	3.39067	1.2167e-23	1.13352e-21
KANK2	11.4903	-16.7085	-1.60034	1.24823e-23	1.15749e-21
NHSL1	9.62205	-16.6962	-1.97395	1.29262e-23	1.1931e-21
ERVFRDE1	3.31589	-16.6896	-2.62993	1.31725e-23	1.21023e-21
CHRM1	3.94392	-16.6553	-4.62947	1.45247e-23	1.32834e-21
PEAR1	7.90472	-16.6413	-2.13944	1.5113e-23	1.37583e-21
LTBP4	11.8328	-16.6315	-2.26756	1.55429e-23	1.40854e-21
OTC	2.08673	-16.6234	-2.98797	1.59058e-23	1.43491e-21
EXO1	5.26654	16.6062	3.58936	1.6704e-23	1.50012e-21
DLGAP5	5.95533	16.5826	4.00042	1.78702e-23	1.59766e-21
LGI3	7.68249	-16.5728	-6.30295	1.83796e-23	1.63587e-21
CRABP2	8.31483	16.5639	4.81075	1.88509e-23	1.67036e-21
FAM136A	9.32496	16.5594	1.06675	1.90946e-23	1.68446e-21
TFR2	3.83936	16.5391	2.65363	2.02401e-23	1.77442e-21
TK1	8.66521	16.5371	2.53143	2.03556e-23	1.77442e-21
ARHGAP31	10.6031	-16.5366	-2.13095	2.03813e-23	1.77442e-21
TOM1L2	10.4239	-16.5266	-1.57085	2.09729e-23	1.81799e-21
SPTBN1	13.7786	-16.5129	-1.63657	2.18164e-23	1.88292e-21
GLIPR2	10.5056	-16.5099	-2.13824	2.20045e-23	1.89096e-21
NUF2	5.47369	16.5072	3.80605	2.21755e-23	1.89748e-21
CSTF2	8.2335	16.5031	1.13183	2.24324e-23	1.91126e-21
AVPR2	4.20564	-16.4962	-2.67456	2.28845e-23	1.94148e-21
FGF11	5.44355	16.4719	3.21953	2.45377e-23	2.07292e-21
EFNA3	5.82853	16.4638	2.53607	2.51159e-23	2.11281e-21
ZNF643	4.68592	16.4495	1.68082	2.6164e-23	2.18256e-21
C20orf194	9.30069	-16.435	-1.45462	2.72788e-23	2.26501e-21
SECISBP2L	11.1136	-16.4337	-1.58208	2.73797e-23	2.26501e-21
EFNA4	7.51037	16.4196	2.06185	2.85171e-23	2.34936e-21
CPB2	6.58314	-16.4163	-5.82995	2.87835e-23	2.36155e-21
CDO1	6.31295	-16.4019	-2.9583	3.0007e-23	2.45184e-21
BUB1B	6.11366	16.399	3.6443	3.02544e-23	2.46197e-21
SLC25A39	11.1213	16.3881	1.10464	3.12206e-23	2.5185e-21
COL10A1	7.22124	16.3877	4.97718	3.12571e-23	2.5185e-21
CCRL1	6.49333	-16.3869	-3.09917	3.13281e-23	2.5185e-21
C10orf116	10.0318	-16.3796	-3.33322	3.19908e-23	2.56145e-21
ADCY8	3.37322	-16.3761	-4.46395	3.23174e-23	2.57725e-21
NEBL	11.0088	-16.3434	-1.82578	3.55135e-23	2.82085e-21
TNS1	13.2469	-16.3368	-2.32538	3.61928e-23	2.8634e-21
LRRN3	6.43792	-16.3086	-3.35638	3.926e-23	3.09378e-21
GJB2	6.73119	16.2891	4.05608	4.15381e-23	3.24763e-21
HTR3C	2.5453	-16.2873	-4.10234	4.17564e-23	3.25195e-21
IQGAP3	6.90493	16.2828	3.69636	4.22996e-23	3.28143e-21
PDZD2	9.7761	-16.279	-2.78283	4.27667e-23	3.30481e-21
SPAG4	5.84963	16.2495	2.75448	4.65874e-23	3.58615e-21
MUSTN1	5.6359	-16.248	-2.40679	4.67834e-23	3.58738e-21
TUBB1	5.38803	-16.2219	-2.63495	5.04667e-23	3.855e-21
ESAM	10.7447	-16.189	-2.08252	5.5509e-23	4.22398e-21
CDC20	7.05441	16.1873	3.85883	5.57885e-23	4.22911e-21
RBP2	3.24492	-16.1838	-4.00069	5.63584e-23	4.24813e-21
MASP1	6.49234	-16.1831	-3.54309	5.64656e-23	4.24813e-21
LRP2BP	6.759	-16.179	-2.35015	5.71428e-23	4.28292e-21
STX1A	6.49492	16.177	2.8617	5.74858e-23	4.29249e-21
SLC35F2	8.82654	16.1594	1.94613	6.04957e-23	4.50039e-21
C16orf88	7.88129	16.1359	1.27107	6.47747e-23	4.78352e-21
TMEM100	8.74664	-16.1359	-4.78758	6.47816e-23	4.78352e-21
GPR17	3.6194	-16.1337	-2.71938	6.51938e-23	4.79619e-21
FXYD1	6.57709	-16.1317	-3.36678	6.55723e-23	4.80631e-21
RAPGEF4	7.24181	-16.1034	-2.16499	7.12102e-23	5.20043e-21
SGOL1	4.18954	16.1003	3.22724	7.1844e-23	5.22757e-21
GPA33	6.20155	-16.0988	-3.98108	7.21578e-23	5.23131e-21
SLC24A4	4.45343	-16.0963	-2.22278	7.26888e-23	5.24188e-21
GIMAP8	9.55006	-16.0954	-2.41061	7.28723e-23	5.24188e-21
MTMR10	9.69071	-16.0944	-1.11681	7.30924e-23	5.24188e-21
MYBL2	7.42382	16.0692	4.06933	7.86712e-23	5.60167e-21
IGSF10	8.15886	-16.0556	-3.60763	8.18504e-23	5.8073e-21
C1orf183	6.27516	-16.0479	-1.57932	8.37084e-23	5.91806e-21
C14orf132	9.61509	-16.0119	-2.63817	9.29779e-23	6.55018e-21
WFS1	11.106	-16.0049	-1.67365	9.49066e-23	6.63391e-21
CCDC141	5.78613	-16.0043	-3.72934	9.507e-23	6.63391e-21
MGC27382	2.96522	-16.004	-3.27829	9.51647e-23	6.63391e-21
C9orf100	5.86625	15.9996	2.08011	9.6406e-23	6.69702e-21
IRAK1	11.2169	15.9825	1.19439	1.01346e-22	7.01577e-21
HBA2	11.0238	-15.9767	-4.09316	1.03089e-22	7.1117e-21
SEMA6A	8.4108	-15.9731	-2.76616	1.04169e-22	7.11571e-21
GPRIN1	6.41054	15.9722	2.69438	1.04436e-22	7.11571e-21
STARD8	8.85557	-15.972	-1.97396	1.04494e-22	7.11571e-21
ZWINT	7.71565	15.9718	2.46914	1.04575e-22	7.11571e-21
PLK1	6.99965	15.9701	3.34181	1.05078e-22	7.12567e-21
KRT4	6.85093	-15.9665	-5.25635	1.06191e-22	7.17201e-21
SCAI	8.51786	-15.9656	-1.49504	1.06481e-22	7.17201e-21
C16orf75	6.88101	15.9586	2.13651	1.08677e-22	7.29524e-21
CRYAB	8.12778	-15.9554	-2.27105	1.09709e-22	7.33983e-21
CDC6	6.65926	15.9538	3.27876	1.1024e-22	7.3507e-21
CCT3	12.072	15.933	1.34306	1.17165e-22	7.78638e-21
SOSTDC1	6.4173	-15.9148	-5.27081	1.23571e-22	8.16135e-21
SCN4B	8.08877	-15.9147	-3.12948	1.23626e-22	8.16135e-21
FCN3	8.86203	-15.9133	-5.03072	1.24113e-22	8.1665e-21
C19orf59	8.91443	-15.9062	-4.84102	1.26745e-22	8.31225e-21
LOC100131726	2.28166	15.9049	3.62627	1.27218e-22	8.31585e-21
CFP	6.98137	-15.8927	-2.36798	1.31847e-22	8.59031e-21
TMEM184A	7.95943	15.8907	2.58745	1.32628e-22	8.61306e-21
FANCA	7.40115	15.88	1.79403	1.36859e-22	8.84206e-21
CCNB2	6.64327	15.8796	3.19477	1.37042e-22	8.84206e-21
KLB	5.81752	-15.8622	-3.31314	1.44223e-22	9.2754e-21
CLEC1A	6.85817	-15.8606	-2.23198	1.44906e-22	9.28939e-21
METTL7A	11.3012	-15.8534	-2.08212	1.47999e-22	9.4572e-21
ADPRH	9.16326	-15.8322	-1.49224	1.57543e-22	1.00245e-20
C14orf139	6.814	-15.8315	-2.21089	1.57882e-22	1.00245e-20
KIAA0101	6.54858	15.8295	2.80072	1.58815e-22	1.00517e-20
TGFBR3	9.43234	-15.8227	-2.78483	1.62036e-22	1.02231e-20
WASF3	8.27701	-15.8137	-2.10602	1.66354e-22	1.04625e-20
HELLS	5.43045	15.8087	2.76189	1.68839e-22	1.05854e-20
CDCA8	6.88266	15.7927	3.06798	1.77013e-22	1.10631e-20
PTPN5	2.87469	-15.7899	-3.44646	1.78463e-22	1.11038e-20
AHNAK	14.7506	-15.7893	-2.0115	1.78779e-22	1.11038e-20
CCNB1	8.08123	15.7727	2.8116	1.87723e-22	1.16231e-20
IGSF9	7.04023	15.756	3.66155	1.97229e-22	1.21739e-20
GINS1	6.48878	15.7457	2.73071	2.03315e-22	1.25108e-20
NCAPH	6.212	15.7412	3.11747	2.0607e-22	1.26413e-20
VAMP2	10.8883	-15.7326	-1.16703	2.11328e-22	1.29241e-20
ODAM	3.62883	-15.7064	-4.14332	2.28417e-22	1.39264e-20
KIF2C	6.48736	15.7017	3.75246	2.31613e-22	1.40782e-20
HSPD1	12.1395	15.6957	1.18929	2.35741e-22	1.42856e-20
GHR	6.34964	-15.6943	-2.28697	2.36733e-22	1.43023e-20
DEPDC1	5.60307	15.6932	3.69499	2.3749e-22	1.43046e-20
INPP5K	10.1526	-15.6664	-1.16631	2.57092e-22	1.53923e-20
GNPNAT1	9.47866	15.6585	1.38796	2.63207e-22	1.57113e-20
C6orf155	4.12839	-15.6396	-2.71447	2.78417e-22	1.65695e-20
WDR12	8.19247	15.6201	1.26711	2.9498e-22	1.7503e-20
LOC401093	7.01882	-15.6008	-2.04307	3.124e-22	1.84816e-20
PPP1R15A	11.5069	-15.5988	-1.81572	3.14242e-22	1.85356e-20
BIRC5	6.11407	15.59	3.86097	3.22618e-22	1.89735e-20
VIPR1	9.12071	-15.5839	-3.7395	3.28526e-22	1.92127e-20
ST14	11.8277	15.5714	1.40814	3.40897e-22	1.98633e-20
ABTB1	9.3473	-15.5706	-1.07131	3.41733e-22	1.98633e-20
MSTO1	8.86493	15.5682	1.39666	3.44135e-22	1.99448e-20
ORC1L	5.36786	15.5621	2.91245	3.5044e-22	2.02514e-20
TIE1	9.91431	-15.5387	-1.85109	3.75758e-22	2.16517e-20
GAB1	9.59647	-15.5299	-1.37643	3.85793e-22	2.21658e-20
HSPB6	8.92135	-15.524	-2.76799	3.92574e-22	2.24907e-20
LIMD1	10.8251	-15.5219	-1.50304	3.95091e-22	2.257e-20
PTTG1	7.44991	15.5126	2.18136	4.06178e-22	2.31371e-20
TENC1	11.1055	-15.5062	-1.65764	4.14043e-22	2.35179e-20
GALNTL4	9.57739	-15.5043	-1.71159	4.16432e-22	2.35864e-20
SLC39A8	12.4335	-15.4973	-2.59681	4.25206e-22	2.39644e-20
LIMCH1	12.1551	-15.497	-1.93934	4.25511e-22	2.39644e-20
NPM3	7.84606	15.4747	1.58694	4.54892e-22	2.5547e-20
LMO2	8.7422	-15.4547	-1.879	4.82873e-22	2.70423e-20
FAM82A2	10.39	-15.4475	-1.06099	4.93318e-22	2.75498e-20
SLC25A10	8.51342	15.4386	1.86689	5.06701e-22	2.82181e-20
PI16	5.02871	-15.4121	-4.17724	5.48455e-22	3.03899e-20
CTHRC1	8.18741	15.4116	3.92944	5.49319e-22	3.03899e-20
MELK	5.89364	15.4107	3.8124	5.50761e-22	3.03899e-20
FGFBP2	4.82708	-15.4101	-3.62992	5.51795e-22	3.03899e-20
CAMP	4.0389	-15.3994	-3.28923	5.69716e-22	3.12904e-20
CEP55	6.90805	15.3955	3.18972	5.76513e-22	3.15767e-20
LRRC59	11.7131	15.3732	1.00042	6.16412e-22	3.36121e-20
PYGM	4.42366	-15.3728	-1.9303	6.17045e-22	3.36121e-20
ADAMTS8	7.79877	-15.3712	-4.45354	6.20109e-22	3.3687e-20
HMGB3	10.3927	15.3596	2.85724	6.42037e-22	3.47834e-20
PDLIM2	10.0661	-15.3485	-1.88754	6.63806e-22	3.58653e-20
ASPA	4.04698	-15.3473	-2.86072	6.66046e-22	3.58891e-20
BCHE	6.58845	-15.3248	-2.86585	7.12691e-22	3.82066e-20
XDH	6.05235	15.3247	3.94555	7.12888e-22	3.82066e-20
ECE2	6.82307	15.3192	1.95361	7.2484e-22	3.8743e-20
MEX3A	6.81483	15.3167	3.66569	7.30176e-22	3.89238e-20
CDC45	5.14641	15.3145	3.66704	7.3516e-22	3.9085e-20
PHACTR1	6.92074	-15.2992	-2.70939	7.69688e-22	4.06033e-20
SSFA2	11.7175	-15.2992	-1.32576	7.69827e-22	4.06033e-20
DEPDC1B	5.09991	15.2824	3.62775	8.09582e-22	4.25874e-20
NOVA2	5.90375	-15.2815	-2.15443	8.11903e-22	4.25971e-20
SPARCL1	12.6658	-15.2789	-1.85343	8.18187e-22	4.28142e-20
RRM2	8.16351	15.2751	3.18671	8.27569e-22	4.31917e-20
RXRG	4.94304	-15.2725	-3.86477	8.34041e-22	4.34159e-20
FHL5	6.52013	-15.2697	-3.07051	8.41264e-22	4.36778e-20
KIF4A	6.17511	15.2678	4.17046	8.46e-22	4.38096e-20
TMEM182	6.54511	15.2635	1.51359	8.56991e-22	4.42364e-20
EPR1	6.71636	15.2629	3.36425	8.58679e-22	4.42364e-20
RECQL4	6.65628	15.2577	2.78771	8.7222e-22	4.48182e-20
TNFRSF21	10.9677	15.2525	1.89979	8.8588e-22	4.54031e-20
HJURP	5.90937	15.2515	3.61687	8.88685e-22	4.543e-20
MMRN2	9.93174	-15.2447	-1.94036	9.07107e-22	4.61121e-20
LEPR	9.50495	-15.244	-2.02838	9.08966e-22	4.61121e-20
PUS7	8.21947	15.2413	1.3091	9.16403e-22	4.63714e-20
FEZ1	8.19786	-15.216	-1.927	9.88972e-22	4.99168e-20
DPEP2	7.41733	-15.2116	-2.65895	1.0024e-21	5.04666e-20
MYO7A	6.99082	15.2104	2.09522	1.00588e-21	5.05145e-20
SLC11A1	9.77374	-15.2047	-2.15979	1.02345e-21	5.12009e-20
SESN1	9.37071	-15.2043	-1.76621	1.02469e-21	5.12009e-20
LPL	10.6034	-15.2023	-3.21309	1.03089e-21	5.13822e-20
LOC283392	2.28411	-15.1977	-2.44917	1.04537e-21	5.19738e-20
SAMD10	6.82043	15.1868	1.35379	1.08023e-21	5.35734e-20
TCEAL2	5.28029	-15.1828	-3.31536	1.09338e-21	5.40909e-20
TGFBR2	12.7426	-15.1819	-1.58232	1.09638e-21	5.41053e-20
GRRP1	5.57387	-15.171	-2.23143	1.133e-21	5.57743e-20
MFNG	9.01135	-15.1498	-1.74446	1.20822e-21	5.93306e-20
PTH1R	6.1317	-15.1488	-2.33941	1.21169e-21	5.93548e-20
ANLN	7.59783	15.1405	3.72135	1.24272e-21	6.07258e-20
PRKG2	5.65833	-15.1311	-3.16876	1.27838e-21	6.23157e-20
GPX3	13.0262	-15.1187	-2.41368	1.32767e-21	6.44031e-20
ADH1A	4.51866	-15.1141	-3.48012	1.3461e-21	6.51389e-20
HEATR1	9.60901	15.1019	1.04169	1.39674e-21	6.74255e-20
HNF4G	5.05111	15.0933	3.35548	1.43376e-21	6.90454e-20
TPX2	7.99408	15.089	3.60636	1.45246e-21	6.97774e-20
AGTPBP1	9.07702	-15.0865	-1.27754	1.46359e-21	7.01435e-20
COLEC10	3.38483	-15.0754	-3.18956	1.51401e-21	7.23856e-20
ABCA8	8.23441	-15.0694	-3.95965	1.54173e-21	7.35345e-20
GPBAR1	5.03015	-15.0668	-2.09812	1.55367e-21	7.38151e-20
PTRF	13.0013	-15.0665	-1.8906	1.55502e-21	7.38151e-20
RAD54L	5.01636	15.0656	3.20319	1.55969e-21	7.38611e-20
MAMDC2	8.65762	-15.0571	-3.22942	1.60048e-21	7.56133e-20
RAI2	8.7258	-15.0532	-1.98957	1.61942e-21	7.63272e-20
ADRB1	6.96614	-15.0434	-4.12796	1.66848e-21	7.84539e-20
UHRF1	6.27502	15.0364	3.49389	1.70401e-21	7.9936e-20
C2orf40	5.99637	-15.0271	-3.53877	1.75327e-21	8.2054e-20
PKHD1L1	5.46313	-15.0172	-3.45638	1.80658e-21	8.43507e-20
CASP12	2.60639	-15.0131	-2.49391	1.82936e-21	8.52148e-20
ADAMTSL3	7.99125	-15.0061	-2.57017	1.8685e-21	8.68353e-20
GYPC	9.44784	-14.9892	-1.69097	1.96767e-21	9.10195e-20
DPP6	3.95362	-14.9821	-3.33909	2.01065e-21	9.27923e-20
AKAP2	10.9978	-14.9693	-2.38799	2.09053e-21	9.62563e-20
PDCD2L	6.9567	14.9656	1.43589	2.11433e-21	9.71276e-20
PLA2G1B	6.10761	-14.951	-4.6285	2.21011e-21	1.01294e-19
ATP10B	4.53347	14.949	4.72265	2.22375e-21	1.01686e-19
SLC5A6	8.8703	14.9483	1.1291	2.22888e-21	1.01687e-19
NEIL3	3.79554	14.9418	3.48238	2.27364e-21	1.03492e-19
CDH19	3.22964	-14.9349	-3.08301	2.32152e-21	1.05431e-19
TFB2M	8.36067	14.9329	1.1813	2.33613e-21	1.05613e-19
ABCA12	4.09123	14.9281	5.30138	2.37079e-21	1.06938e-19
CENPA	4.78919	14.9185	3.37296	2.44086e-21	1.0985e-19
SEMA6D	7.45686	-14.9139	-2.63469	2.47585e-21	1.11174e-19
SLC22A18AS	4.33706	14.9127	2.79187	2.48453e-21	1.11312e-19
F10	6.40867	-14.91	-2.13587	2.50517e-21	1.11985e-19
GGA2	11.5139	-14.8968	-1.01061	2.60843e-21	1.16281e-19
MFAP4	11.9705	-14.8962	-2.74591	2.61292e-21	1.16281e-19
SPAG5	7.43759	14.8929	3.00381	2.64003e-21	1.17138e-19
NDST1	11.8133	-14.8924	-1.45348	2.64394e-21	1.17138e-19
CES4	5.50751	-14.887	-2.70917	2.68775e-21	1.18815e-19
DKC1	10.0306	14.8822	1.10559	2.72779e-21	1.20319e-19
RBMS2	11.0503	-14.8734	-1.2863	2.80226e-21	1.2333e-19
ABI3BP	9.97784	-14.8704	-2.88024	2.82806e-21	1.24192e-19
CCNE1	5.39836	14.8532	3.05964	2.98069e-21	1.30607e-19
ADAMTSL4	10.0218	-14.8481	-2.25187	3.02734e-21	1.3236e-19
AATK	8.11556	-14.8373	-2.96394	3.12969e-21	1.36535e-19
RALGPS2	8.18728	14.8262	1.87518	3.23737e-21	1.40739e-19
IL3RA	8.26352	-14.826	-1.80761	3.24018e-21	1.40739e-19
FGR	9.57181	-14.813	-2.22708	3.37148e-21	1.46124e-19
KIF14	5.31515	14.8085	3.66211	3.41833e-21	1.47834e-19
ACACB	8.35177	-14.8056	-1.80724	3.4495e-21	1.48859e-19
XPR1	10.6744	14.7862	1.55149	3.66061e-21	1.57628e-19
SIRPB1	8.41061	-14.7823	-2.43006	3.70457e-21	1.59177e-19
FAM162B	6.331	-14.7736	-2.29836	3.80565e-21	1.63168e-19
APOA1	2.96751	-14.7691	-2.66923	3.85861e-21	1.65084e-19
TACC1	11.9281	-14.7674	-1.81203	3.87854e-21	1.65581e-19
AGMAT	4.13786	14.7647	2.83244	3.91014e-21	1.66574e-19
PLEK2	7.03015	14.7632	2.6532	3.92869e-21	1.67007e-19
SPP1	10.1139	14.7604	4.83219	3.96281e-21	1.68099e-19
DBNDD1	8.33915	14.7582	1.92034	3.98968e-21	1.6888e-19
FRMD5	3.77657	14.7471	3.47128	4.12832e-21	1.74378e-19
HRCT1	5.36041	-14.7451	-2.05357	4.1537e-21	1.75079e-19
RADIL	6.40922	-14.741	-2.94787	4.20614e-21	1.76915e-19
RRAS	10.4225	-14.7372	-1.49156	4.25576e-21	1.78625e-19
CENPF	8.12423	14.7289	3.2801	4.36629e-21	1.8288e-19
SLC2A1	9.85738	14.7272	3.29094	4.389e-21	1.83062e-19
CORO2B	6.90441	-14.7186	-2.28886	4.5066e-21	1.87574e-19
LAMP3	12.1304	-14.706	-3.29649	4.68466e-21	1.94579e-19
ASF1B	7.24884	14.7048	2.29716	4.70281e-21	1.94927e-19
PRDX4	10.5797	14.7008	1.51757	4.7605e-21	1.96552e-19
BUB1	7.1334	14.7007	2.7323	4.76172e-21	1.96552e-19
B4GALT2	9.61538	14.6952	1.18833	4.84398e-21	1.99534e-19
ANO2	3.98567	-14.6817	-2.41997	5.04924e-21	2.0756e-19
VEPH1	8.39949	-14.6769	-3.50599	5.1241e-21	2.10204e-19
ANKS1A	10.6524	-14.6743	-1.06002	5.16532e-21	2.1146e-19
EPHA10	5.52342	14.668	3.29767	5.26663e-21	2.15165e-19
CKAP2L	5.51752	14.6663	3.17065	5.29507e-21	2.15885e-19
FAM189A1	4.72613	-14.6649	-3.00182	5.318e-21	2.16377e-19
DES	8.77829	-14.6587	-3.75944	5.42077e-21	2.2011e-19
SLFNL1	5.27491	-14.6512	-2.79187	5.54742e-21	2.24794e-19
KPNA2	10.1076	14.6405	1.92134	5.73444e-21	2.31902e-19
P4HB	14.3136	14.6381	1.07346	5.77739e-21	2.33166e-19
SLC27A3	9.75687	-14.6367	-1.60152	5.80243e-21	2.33703e-19
SKA3	5.15137	14.6291	3.14735	5.93944e-21	2.38739e-19
DONSON	7.1724	14.6115	1.56441	6.27094e-21	2.51557e-19
F11	5.20745	-14.5984	-4.91344	6.53115e-21	2.60945e-19
HBB	11.4244	-14.5911	-4.02849	6.67975e-21	2.66348e-19
LYVE1	8.55289	-14.5871	-3.01955	6.76354e-21	2.69151e-19
STIL	6.57622	14.5663	2.51357	7.21465e-21	2.86531e-19
EDN3	2.73155	-14.5468	-3.33921	7.66422e-21	3.0378e-19
CDCA3	5.47472	14.5445	3.05476	7.71865e-21	3.05331e-19
PGM2L1	8.89082	14.5398	1.93061	7.83151e-21	3.09182e-19
CDKN3	5.35841	14.5325	2.96544	8.00981e-21	3.15596e-19
RASGRP4	6.61867	-14.5308	-2.21072	8.05412e-21	3.16716e-19
GNAQ	11.2691	-14.5301	-1.09109	8.07162e-21	3.16779e-19
SEMA5A	10.0334	-14.5231	-2.53078	8.24743e-21	3.23043e-19
C1QTNF7	7.13193	-14.5213	-2.74911	8.29329e-21	3.24203e-19
FRMD3	5.39176	-14.5198	-2.76651	8.33337e-21	3.25132e-19
MYO19	8.83983	14.5167	1.39819	8.41253e-21	3.27579e-19
ADCY4	7.6803	-14.5086	-2.05092	8.62864e-21	3.35054e-19
SLC44A2	12.4148	-14.5082	-1.05447	8.6381e-21	3.35054e-19
KIF11	7.55022	14.507	2.81354	8.67037e-21	3.35653e-19
L1TD1	4.24905	-14.495	-2.29125	8.99876e-21	3.4769e-19
SFXN4	8.10915	14.4859	1.23327	9.25769e-21	3.57003e-19
SOX7	8.28073	-14.4734	-2.74998	9.62454e-21	3.70433e-19
HSPB3	3.0108	-14.4714	-2.29681	9.68492e-21	3.72039e-19
SMAD6	8.17423	-14.466	-2.62424	9.84953e-21	3.77151e-19
CTDSPL	10.5334	-14.4658	-1.19576	9.85584e-21	3.77151e-19
LRRC2	5.07787	-14.4585	-2.84	1.00802e-20	3.84998e-19
TBX4	8.4996	-14.4436	-2.36651	1.05615e-20	4.0261e-19
LYPD1	5.76714	14.439	3.36631	1.07119e-20	4.07565e-19
GSTM5	7.13622	-14.4363	-2.36396	1.08032e-20	4.10252e-19
AURKB	5.56324	14.4232	3.38088	1.12541e-20	4.26564e-19
SERINC2	10.8021	14.4145	1.90059	1.1561e-20	4.37367e-19
AGTR1	5.93099	-14.4139	-2.72998	1.15834e-20	4.37385e-19
TBX2	9.7484	-14.403	-1.93197	1.19836e-20	4.51639e-19
PDE8B	5.98271	-14.4023	-2.3264	1.20117e-20	4.51843e-19
NOTCH4	9.60853	-14.3903	-1.85579	1.24691e-20	4.68167e-19
PLCL1	7.36407	-14.3723	-1.68231	1.31901e-20	4.94305e-19
SPN	9.70677	-14.365	-2.39709	1.34946e-20	5.04768e-19
DPYSL2	12.3962	-14.3638	-1.56003	1.35461e-20	5.05747e-19
GALNT7	9.88894	14.3574	1.6685	1.3819e-20	5.14971e-19
DUSP27	2.79506	-14.3554	-2.91508	1.39047e-20	5.17199e-19
TNXB	10.5356	-14.3399	-3.40956	1.45926e-20	5.41776e-19
OSCAR	8.76335	-14.3377	-2.37932	1.46954e-20	5.43786e-19
C1orf74	5.96757	14.3372	1.43073	1.47179e-20	5.43786e-19
NXPH3	6.84415	-14.337	-2.36831	1.47286e-20	5.43786e-19
NXF3	3.85146	-14.3178	-3.87691	1.5639e-20	5.7633e-19
KDELR3	8.86048	14.3151	2.06952	1.57727e-20	5.79117e-19
BMX	4.61587	-14.3118	-3.0043	1.59372e-20	5.84082e-19
PRAM1	7.28286	-14.3112	-2.61669	1.59679e-20	5.84133e-19
FIGF	7.51941	-14.3076	-4.98642	1.61492e-20	5.89683e-19
MCM10	5.1602	14.305	3.43903	1.62813e-20	5.93418e-19
NPNT	11.2455	-14.3009	-2.33051	1.6487e-20	5.98972e-19
DLC1	11.5303	-14.3008	-2.52958	1.64937e-20	5.98972e-19
C1orf107	8.98495	14.2926	1.02828	1.6924e-20	6.1348e-19
IL11RA	7.77256	-14.2741	-1.59369	1.7931e-20	6.48802e-19
COL6A6	8.16941	-14.2723	-3.39614	1.80341e-20	6.51353e-19
FAT3	5.65423	-14.2706	-2.82319	1.81331e-20	6.53336e-19
MLF1IP	7.19791	14.2702	2.07967	1.81546e-20	6.53336e-19
IHH	4.55098	-14.2672	-3.93406	1.8326e-20	6.58318e-19
NDC80	5.69342	14.2564	3.21193	1.89562e-20	6.79728e-19
NUSAP1	7.69568	14.2545	2.50533	1.90732e-20	6.81724e-19
ASPM	6.53627	14.2543	3.47168	1.90802e-20	6.81724e-19
KLF9	10.9521	-14.2416	-1.43372	1.98587e-20	7.0827e-19
AFF3	7.76576	-14.2373	-3.27357	2.01281e-20	7.16598e-19
SPC24	2.78036	14.2342	2.68893	2.03278e-20	7.22415e-19
SRD5A1	7.77544	14.2294	1.77982	2.06335e-20	7.31976e-19
EPN3	6.54532	14.2147	3.28374	2.16099e-20	7.65252e-19
AGAP11	4.8602	-14.2141	-2.5895	2.16504e-20	7.65328e-19
AURKA	7.34652	14.2123	2.35696	2.17713e-20	7.68236e-19
CILP2	5.64321	14.2052	3.7559	2.22629e-20	7.84198e-19
ARRB1	10.214	-14.1953	-1.45257	2.29672e-20	8.07577e-19
MANEAL	7.99841	14.1909	1.81274	2.32856e-20	8.17333e-19
MS4A7	10.2478	-14.1881	-2.37589	2.34956e-20	8.23253e-19
PTPRH	4.65618	14.1776	4.69933	2.42842e-20	8.49393e-19
NLRC4	7.33111	-14.1751	-2.23716	2.44746e-20	8.54552e-19
FGF2	7.53848	-14.1604	-2.03321	2.56339e-20	8.9345e-19
ECT2	8.87085	14.1585	2.03921	2.57905e-20	8.95791e-19
MANF	10.0756	14.1479	1.31776	2.6664e-20	9.24523e-19
SIRPD	2.00301	-14.1454	-1.81182	2.68712e-20	9.3009e-19
SULT1C4	5.97063	-14.144	-2.34561	2.69923e-20	9.32661e-19
NME4	9.96828	14.1413	1.24504	2.72212e-20	9.38943e-19
C20orf20	8.26457	14.1394	1.01809	2.73888e-20	9.43093e-19
SULT1A1	9.42048	-14.1319	-1.99473	2.80425e-20	9.62277e-19
SLC25A13	9.01984	14.1237	1.07758	2.87775e-20	9.85802e-19
LIN7A	4.82603	-14.1211	-2.69408	2.90138e-20	9.90494e-19
PLA2G4F	8.40726	-14.1193	-3.71196	2.91798e-20	9.94457e-19
AGBL1	2.61543	-14.1158	-2.84041	2.95029e-20	1.00122e-18
GPI	12.1929	14.1156	1.13822	2.95256e-20	1.00122e-18
ACE	10.843	-14.1155	-1.82127	2.95289e-20	1.00122e-18
F12	4.75783	14.1134	2.82561	2.97282e-20	1.00627e-18
GPR172A	10.0427	14.1119	1.30097	2.98701e-20	1.00935e-18
GFOD1	5.86093	-14.0748	-1.63652	3.3586e-20	1.12918e-18
PALMD	8.82005	-14.064	-2.01941	3.4747e-20	1.16625e-18
SHROOM4	9.66042	-14.0617	-1.93954	3.50063e-20	1.17172e-18
TIMM8A	6.49935	14.0615	1.23169	3.50275e-20	1.17172e-18
PLEKHA8	6.2677	14.0585	1.39401	3.53581e-20	1.17735e-18
PKMYT1	5.93073	14.0584	3.0152	3.5371e-20	1.17735e-18
SGK269	10.7185	-14.0584	-1.52856	3.53729e-20	1.17735e-18
PPM1F	9.91802	-14.0542	-1.2765	3.58402e-20	1.19091e-18
SSTR1	6.78839	-14.0534	-3.39481	3.59276e-20	1.19183e-18
CHAF1B	6.67051	14.0426	1.9872	3.71859e-20	1.23152e-18
NCAPG	6.54682	14.0396	3.26578	3.75405e-20	1.2412e-18
AMOTL1	10.6906	-14.0309	-1.64911	3.85855e-20	1.27364e-18
PTPRM	10.5452	-14.0302	-1.59552	3.86746e-20	1.27447e-18
EZH2	6.92833	14.0181	2.4712	4.01799e-20	1.32122e-18
BDNF	5.97438	-14.0177	-3.38548	4.02258e-20	1.32122e-18
LOXHD1	3.38867	-14.016	-2.37959	4.045e-20	1.32515e-18
MME	9.40608	-14.0158	-3.24373	4.04783e-20	1.32515e-18
ART4	4.33446	-14.0094	-2.44186	4.13013e-20	1.34988e-18
C1orf112	6.59833	14.0053	1.73289	4.18438e-20	1.36537e-18
CMTM5	1.93477	-14.0011	-2.11869	4.24069e-20	1.38148e-18
RHOJ	7.95441	-13.9943	-1.62086	4.33246e-20	1.40907e-18
LOC400804	1.27785	-13.992	-1.64855	4.36401e-20	1.41702e-18
ZBTB16	6.61467	-13.9868	-3.23261	4.4363e-20	1.43816e-18
FXYD6	10.0236	-13.9848	-1.78934	4.4647e-20	1.44501e-18
MAD2L1	7.02391	13.9815	2.46824	4.51249e-20	1.45811e-18
GLDN	7.69016	-13.972	-3.11536	4.65096e-20	1.50042e-18
GIMAP6	9.87037	-13.9443	-2.04699	5.07765e-20	1.63279e-18
SLC1A1	9.39438	-13.9381	-2.66922	5.17827e-20	1.66247e-18
PPIF	9.74456	13.9257	1.10917	5.38767e-20	1.72691e-18
CYBRD1	12.2649	-13.9175	-1.95388	5.52853e-20	1.76922e-18
CCT5	11.8655	13.9145	1.20448	5.58259e-20	1.78366e-18
SYNPO	12.0875	-13.913	-1.68506	5.60969e-20	1.78945e-18
LHFP	9.88105	-13.9097	-1.61352	5.66808e-20	1.80518e-18
ARC	5.66412	-13.9089	-3.4103	5.68228e-20	1.80682e-18
MND1	3.7126	13.9013	3.28534	5.82214e-20	1.84834e-18
DCAF13	9.40545	13.8905	1.23152	6.02531e-20	1.9098e-18
STK39	9.35794	13.8853	1.3808	6.12581e-20	1.93858e-18
MAG	2.20948	-13.8787	-2.39143	6.25585e-20	1.97201e-18
FHL2	9.11773	13.8786	2.60292	6.25734e-20	1.97201e-18
ITIH5	9.24336	-13.8784	-2.58219	6.26113e-20	1.97201e-18
SCARF1	8.86914	-13.877	-1.5143	6.29034e-20	1.97502e-18
PRC1	8.01342	13.877	2.43874	6.2905e-20	1.97502e-18
ORC6L	5.25763	13.8762	2.79916	6.305e-20	1.97543e-18
SLC16A11	5.72461	-13.8759	-2.75847	6.31162e-20	1.97543e-18
SYNM	9.0517	-13.8583	-1.78393	6.67676e-20	2.08644e-18
ANGPTL5	2.49152	-13.8539	-2.35545	6.77004e-20	2.11227e-18
HSPB8	9.91841	-13.8514	-2.27245	6.82466e-20	2.12599e-18
FLAD1	9.37317	13.85	1.30798	6.8547e-20	2.13201e-18
SHMT2	10.2296	13.847	1.29873	6.9219e-20	2.14631e-18
PDF	6.69101	13.8469	1.15882	6.92219e-20	2.14631e-18
SPATS2	8.76365	13.8441	1.13529	6.98584e-20	2.16268e-18
CCNA2	7.07556	13.8434	2.81857	7.00149e-20	2.16416e-18
CSRNP1	11.0142	-13.8245	-2.11102	7.43566e-20	2.29061e-18
ANKRD29	8.30077	-13.8241	-3.20131	7.44502e-20	2.29061e-18
NEK2	6.05388	13.8221	3.66456	7.49286e-20	2.30178e-18
HMGA1	10.8694	13.8192	2.07226	7.56283e-20	2.3197e-18
GRHL3	3.38251	13.8173	3.41753	7.60902e-20	2.33028e-18
PVT1	5.34535	13.7987	2.0466	8.0739e-20	2.46885e-18
FRY	9.90139	-13.7979	-1.67224	8.09564e-20	2.47171e-18
BLM	6.00218	13.7927	2.12883	8.23068e-20	2.5091e-18
SIGLECP3	4.90468	-13.7687	-2.19139	8.88757e-20	2.70109e-18
DNAH14	5.6462	13.7661	1.7196	8.9606e-20	2.71914e-18
UTRN	11.7273	-13.7603	-1.47072	9.12975e-20	2.76206e-18
CBLC	6.46381	13.7595	3.02322	9.15393e-20	2.76518e-18
CDCA5	7.10127	13.7586	2.81922	9.17945e-20	2.76869e-18
QKI	11.6144	-13.7532	-1.23421	9.33823e-20	2.81233e-18
C1orf170	4.11745	13.7499	2.41086	9.4386e-20	2.83827e-18
SALL4	3.37578	13.7481	2.71021	9.49281e-20	2.85027e-18
TROAP	5.40944	13.7468	3.44016	9.53334e-20	2.85814e-18
C17orf53	5.25118	13.7358	2.39112	9.87327e-20	2.95561e-18
XRCC2	4.48432	13.7342	2.66983	9.92406e-20	2.96636e-18
PTCRA	3.82891	-13.7181	-2.48019	1.04522e-19	3.11956e-18
MCM4	9.27692	13.7138	2.07715	1.05974e-19	3.15814e-18
C8B	5.31288	-13.7098	-4.619	1.07336e-19	3.19396e-18
TPPP3	10.3053	-13.7087	-3.1443	1.07705e-19	3.20019e-18
CLDN18	11.0966	-13.7065	-6.70303	1.08463e-19	3.2179e-18
LGI4	5.76659	-13.6939	-2.02106	1.12925e-19	3.34034e-18
PRSS35	4.65309	-13.6894	-2.61228	1.14571e-19	3.384e-18
KIF17	6.05606	-13.687	-2.14446	1.15461e-19	3.40524e-18
CD101	7.46132	-13.6821	-2.70612	1.17282e-19	3.45385e-18
HSD17B6	9.47087	-13.6793	-3.23026	1.18342e-19	3.47992e-18
RAG1AP1	9.96589	13.6747	1.4397	1.2012e-19	3.527e-18
FERMT2	10.5685	-13.6732	-1.32764	1.20687e-19	3.53844e-18
ILF2	11.6506	13.6689	1.08008	1.22373e-19	3.58259e-18
MGC42105	5.28325	-13.6666	-2.88859	1.23291e-19	3.60419e-18
CANT1	10.8749	13.6655	1.00966	1.23737e-19	3.61192e-18
CD52	10.5419	-13.6618	-2.52951	1.25216e-19	3.64975e-18
GYG2	6.61263	13.6606	2.21706	1.25687e-19	3.6559e-18
HN1	10.6475	13.6603	1.50847	1.25794e-19	3.6559e-18
FUT2	6.8451	13.6504	2.86077	1.29864e-19	3.76322e-18
ESCO2	5.03591	13.6491	2.59567	1.3043e-19	3.77415e-18
FGFR4	8.86537	-13.637	-3.35146	1.35569e-19	3.91717e-18
SLIT2	9.30502	-13.6357	-2.28888	1.36138e-19	3.92789e-18
ANKRD1	7.24835	-13.6323	-5.25813	1.37641e-19	3.96552e-18
KIF18B	5.56935	13.6264	3.42617	1.40283e-19	4.03583e-18
NARF	9.72116	13.6255	1.067	1.4072e-19	4.04255e-18
ENO1	14.6725	13.6215	1.26372	1.42534e-19	4.08291e-18
FAM64A	4.89429	13.6082	3.11821	1.48739e-19	4.25452e-18
FAM111B	6.36612	13.6015	2.67769	1.51985e-19	4.34117e-18
HSPB2	6.59585	-13.599	-1.77831	1.53247e-19	4.37093e-18
GATA1	2.44404	-13.5941	-1.9263	1.55673e-19	4.43378e-18
ERO1L	10.3481	13.5854	2.02025	1.60108e-19	4.5471e-18
SC65	8.42953	13.5848	1.8317	1.60371e-19	4.54812e-18
STRA6	4.80671	13.5838	4.22619	1.60906e-19	4.5568e-18
TRPV2	9.84079	-13.5812	-1.88031	1.62274e-19	4.58251e-18
CENPL	6.7992	13.5741	1.43506	1.66013e-19	4.68146e-18
TYMS	8.00303	13.57	2.12914	1.68211e-19	4.73676e-18
AGRP	3.50989	-13.567	-3.16629	1.69863e-19	4.77654e-18
RFWD3	9.2618	13.5458	1.02173	1.81867e-19	5.0997e-18
CYP27A1	11.0355	-13.5382	-1.94752	1.86392e-19	5.21925e-18
SOX4	11.2757	13.5317	1.64302	1.90369e-19	5.32312e-18
ZYG11A	2.80766	13.5301	3.94182	1.91334e-19	5.3426e-18
SOX17	6.63752	-13.5286	-2.50226	1.92251e-19	5.36071e-18
SPTBN2	8.48594	13.5194	2.44665	1.98074e-19	5.51535e-18
DNA2	5.79267	13.5172	2.06608	1.99467e-19	5.54641e-18
LDHA	13.4689	13.5145	1.38059	2.01239e-19	5.58788e-18
ARHGAP24	8.93164	-13.5034	-1.38599	2.08574e-19	5.77546e-18
KIF23	6.89485	13.499	2.61584	2.11566e-19	5.85019e-18
FANCI	8.19067	13.4897	2.0037	2.18053e-19	6.02123e-18
C1QTNF2	5.47034	-13.4881	-1.95818	2.19148e-19	6.04309e-18
GAPDH	14.7729	13.4863	1.57296	2.20468e-19	6.0711e-18
LOH3CR2A	6.35729	-13.4842	-1.75239	2.21959e-19	6.10371e-18
CHRNA5	4.87237	13.472	2.60348	2.30911e-19	6.33084e-18
BCL6B	8.74559	-13.4716	-1.68596	2.31171e-19	6.33084e-18
HBEGF	10.1699	-13.4607	-2.36112	2.39486e-19	6.54956e-18
LOC100129550	7.96362	-13.4575	-1.18854	2.42019e-19	6.60978e-18
LHFPL3	4.43968	-13.444	-3.33386	2.52811e-19	6.88565e-18
CYP17A1	2.95713	-13.4426	-2.73796	2.53959e-19	6.90746e-18
SHCBP1	6.4353	13.4419	2.40098	2.54531e-19	6.9136e-18
P2RY6	6.62844	13.4265	2.59866	2.67563e-19	7.24783e-18
PGM5	8.26462	-13.4237	-2.38246	2.6998e-19	7.30338e-18
TDRKH	8.51177	13.393	1.3001	2.98237e-19	8.05684e-18
SYNJ2	8.11273	13.3849	1.82268	3.06254e-19	8.26223e-18
C1orf198	11.7452	-13.3843	-1.24191	3.06837e-19	8.26677e-18
FEN1	8.65958	13.3804	1.51312	3.10755e-19	8.36104e-18
PHACTR2	10.3894	-13.375	-1.35126	3.16274e-19	8.49806e-18
MAP3K3	10.143	-13.3733	-1.04851	3.17947e-19	8.53149e-18
CD93	11.9797	-13.3704	-1.90252	3.21059e-19	8.60343e-18
ANGPT1	8.73864	-13.3629	-2.58613	3.28938e-19	8.80273e-18
ESPL1	5.9361	13.3587	3.06897	3.33435e-19	8.91112e-18
ATP1A2	5.97355	-13.3552	-3.01225	3.37303e-19	9.00243e-18
CST1	3.94911	13.3543	5.60996	3.38271e-19	9.0162e-18
KDM5B	10.7187	13.3518	1.07359	3.41049e-19	9.07809e-18
ABCG2	7.37992	-13.3512	-2.13662	3.41719e-19	9.08381e-18
ARHGEF16	8.48198	13.3492	1.50321	3.43951e-19	9.11883e-18
MNX1	2.81203	13.3427	3.00864	3.51259e-19	9.3002e-18
GATA6	8.90711	-13.3383	-2.22299	3.56361e-19	9.42277e-18
ITM2A	9.25939	-13.3269	-2.05321	3.69807e-19	9.76536e-18
EPB41L5	9.81698	-13.3224	-1.48438	3.75239e-19	9.89568e-18
SLC27A6	3.31817	-13.3188	-3.57676	3.79725e-19	1.00008e-17
TTK	5.45529	13.3155	3.43429	3.83799e-19	1.00947e-17
KIAA1462	10.906	-13.3127	-1.87002	3.87331e-19	1.01742e-17
GPR120	4.75167	-13.3122	-2.89589	3.8796e-19	1.01773e-17
ADAMTS14	5.43943	13.3086	2.57688	3.92535e-19	1.02838e-17
SLC5A4	2.61964	-13.3037	-2.20873	3.98812e-19	1.04266e-17
PID1	9.06812	-13.3031	-2.09796	3.99538e-19	1.04266e-17
KLF13	11.5671	-13.3031	-1.37962	3.99554e-19	1.04266e-17
LOC100190938	5.12116	-13.2987	-2.27717	4.05353e-19	1.05503e-17
PDE5A	9.51999	-13.2976	-1.63323	4.06836e-19	1.05751e-17
LOC723809	5.9677	-13.2898	-3.97119	4.17303e-19	1.0833e-17
RBM28	8.25536	13.2878	1.0836	4.20064e-19	1.08905e-17
FBLN5	10.675	-13.2851	-2.03249	4.23758e-19	1.0972e-17
CHRM2	2.04888	-13.2816	-2.73616	4.28563e-19	1.1082e-17
KIFC1	7.25596	13.2796	2.4878	4.31464e-19	1.11426e-17
PPAP2B	11.1098	-13.2635	-1.22333	4.54692e-19	1.17273e-17
GPM6B	7.89084	-13.2508	-2.2868	4.73935e-19	1.22078e-17
MKI67	8.87435	13.2419	3.03123	4.87892e-19	1.25511e-17
RPP40	5.98147	13.2384	1.64386	4.93549e-19	1.26803e-17
DOCK4	9.89518	-13.2238	-1.6668	5.1768e-19	1.3266e-17
SORBS1	9.60885	-13.2195	-1.6879	5.24923e-19	1.34344e-17
RNF144B	10.2406	-13.2189	-1.61451	5.26001e-19	1.34447e-17
DUOX1	10.3205	-13.2183	-3.8082	5.27095e-19	1.34554e-17
INCA1	4.41204	-13.2125	-1.35982	5.37178e-19	1.36953e-17
CCNF	7.37429	13.2003	1.79443	5.5891e-19	1.4213e-17
PROM2	9.26871	13.1915	2.42156	5.75336e-19	1.46121e-17
FBXO32	7.77001	13.1874	2.34194	5.83089e-19	1.47901e-17
KAT2A	9.25738	13.1806	1.19468	5.96132e-19	1.51018e-17
PBK	5.40613	13.177	3.3591	6.03193e-19	1.52612e-17
CDCA2	5.03472	13.1764	2.94753	6.04423e-19	1.5273e-17
BRIP1	4.93352	13.1674	2.71102	6.22508e-19	1.56902e-17
PTGER4	8.96238	-13.1636	-1.65203	6.30367e-19	1.58682e-17
HYOU1	11.9245	13.1597	1.16416	6.38356e-19	1.60491e-17
RGS17	3.58761	13.1556	3.30485	6.47125e-19	1.62299e-17
SEC14L3	3.56373	-13.1556	-3.83751	6.47177e-19	1.62299e-17
LOC399815	2.30229	13.1531	2.41182	6.52387e-19	1.634e-17
ZBTB4	11.5403	-13.1485	-1.07053	6.62232e-19	1.65658e-17
ADH1B	11.0448	-13.1465	-4.49507	6.66634e-19	1.6655e-17
TSPAN32	4.79416	-13.1347	-2.08508	6.9293e-19	1.72903e-17
CAB39L	8.59598	-13.1341	-1.47912	6.94436e-19	1.72909e-17
SLC14A1	5.93079	-13.1282	-3.31463	7.08004e-19	1.76003e-17
LILRA5	6.99644	-13.1159	-2.14031	7.37095e-19	1.83007e-17
HPRT1	9.00612	13.1132	1.03725	7.4355e-19	1.8438e-17
RAD51	5.58389	13.1023	2.20604	7.70834e-19	1.90908e-17
KLF6	12.6146	-13.1	-1.46237	7.76648e-19	1.91912e-17
THBS2	10.3884	13.0999	3.09745	7.76811e-19	1.91912e-17
MAP3K15	3.13004	-13.0977	-2.99082	7.82498e-19	1.93078e-17
NME2	12.2277	13.0948	1.09169	7.89979e-19	1.94683e-17
TRAF4	10.2952	13.0936	1.00642	7.93004e-19	1.95187e-17
S1PR4	7.59496	-13.0931	-2.00211	7.94474e-19	1.95307e-17
APBB1	9.3013	-13.0836	-1.5779	8.19687e-19	2.01257e-17
CFD	9.74248	-13.0683	-2.74987	8.61741e-19	2.11063e-17
DNASE1L3	6.43081	-13.067	-3.76492	8.65419e-19	2.11486e-17
MT1M	6.56003	-13.067	-2.66006	8.65591e-19	2.11486e-17
FPR2	6.98348	-13.0615	-2.82678	8.81228e-19	2.14631e-17
KHDRBS2	4.59636	-13.06	-3.1865	8.85556e-19	2.15309e-17
EPT1	9.56409	13.049	1.14717	9.18297e-19	2.22997e-17
PKP3	9.74402	13.0457	1.28051	9.28459e-19	2.25079e-17
FOXM1	7.62828	13.0455	3.13439	9.29126e-19	2.25079e-17
CCIN	3.13132	-13.0403	-1.74547	9.45073e-19	2.28251e-17
PARP1	11.5154	13.04	1.04754	9.45903e-19	2.28251e-17
GGCT	9.49426	13.04	1.37304	9.46048e-19	2.28251e-17
STEAP1	7.25552	13.0397	2.73125	9.468e-19	2.28251e-17
CELSR3	6.14321	13.0391	2.74291	9.48665e-19	2.28424e-17
OLR1	10.2181	-13.0251	-2.95364	9.93394e-19	2.38906e-17
C11orf24	9.5555	13.0138	1.02018	1.03118e-18	2.47494e-17
GTSE1	5.77892	12.991	3.1301	1.11176e-18	2.66407e-17
SEPT4	8.08389	-12.9895	-1.55937	1.11706e-18	2.67126e-17
ENDOU	2.26776	-12.9894	-1.98989	1.11743e-18	2.67126e-17
CACNA1S	1.91818	-12.9881	-2.85365	1.12249e-18	2.68012e-17
HSPE1	10.2125	12.9855	1.09812	1.13207e-18	2.69978e-17
SLC7A5	9.74377	12.9845	2.25155	1.13594e-18	2.70573e-17
ANKRD22	7.52606	12.9841	2.70403	1.13728e-18	2.70573e-17
PPAP2C	9.16441	12.9801	2.65435	1.15228e-18	2.73814e-17
TFAP2A	5.62511	12.9743	3.68273	1.17482e-18	2.78837e-17
HYAL2	11.3413	-12.9585	-1.15629	1.23778e-18	2.93432e-17
PLLP	9.55576	-12.9501	-2.27808	1.27247e-18	3.01297e-17
IPO4	9.55948	12.9491	1.21663	1.27664e-18	3.01925e-17
CYP24A1	5.88631	12.9461	5.41612	1.28933e-18	3.04565e-17
CXorf57	5.977	-12.9361	-2.30317	1.33256e-18	3.14405e-17
EMR3	4.74044	-12.9321	-2.89405	1.35025e-18	3.18203e-17
MYO7B	4.51574	-12.9284	-2.88427	1.36701e-18	3.21771e-17
SGCA	6.94876	-12.9189	-2.3138	1.41044e-18	3.31211e-17
PKM2	14.3462	12.9145	1.01559	1.43131e-18	3.35718e-17
C1orf162	9.16377	-12.9114	-1.94925	1.4462e-18	3.38018e-17
PLEKHH2	8.88254	-12.9088	-2.03418	1.45881e-18	3.40167e-17
SNRK	10.2916	-12.9022	-1.0894	1.49057e-18	3.47167e-17
CDT1	6.59714	12.8998	2.68015	1.50245e-18	3.49119e-17
SPC25	4.80599	12.8974	2.81823	1.51453e-18	3.51106e-17
TBX3	8.67595	-12.8913	-2.10366	1.54566e-18	3.57492e-17
C17orf91	8.29301	-12.8834	-1.63515	1.58637e-18	3.6606e-17
SCN7A	8.48981	-12.8806	-2.80709	1.60133e-18	3.69084e-17
ENC1	10.3587	12.8799	1.17779	1.60508e-18	3.69522e-17
GREM1	7.29346	12.8735	4.82386	1.63968e-18	3.77051e-17
A2M	15.3075	-12.8629	-1.88051	1.69827e-18	3.90074e-17
DARS2	8.80837	12.8614	1.20098	1.70633e-18	3.91475e-17
DOK2	9.16328	-12.8404	-2.01485	1.82933e-18	4.19212e-17
PCOLCE2	7.80832	-12.8393	-3.02399	1.83618e-18	4.20297e-17
CASKIN2	10.1522	-12.8208	-1.64356	1.95231e-18	4.45345e-17
AP1S1	9.6019	12.8173	1.09888	1.9754e-18	4.50097e-17
HYAL1	8.97232	-12.8113	-2.99362	2.01545e-18	4.58699e-17
ACP5	11.8467	-12.8092	-1.92622	2.02961e-18	4.61394e-17
FAM128A	8.08598	12.8063	1.05968	2.04917e-18	4.65312e-17
PDIA6	12.7004	12.8034	1.01397	2.06869e-18	4.69209e-17
RGS9	5.39861	-12.7973	-2.74581	2.11136e-18	4.778e-17
AVL9	8.43016	12.7927	1.27265	2.14367e-18	4.84563e-17
ICAM2	9.50902	-12.7851	-1.40682	2.19835e-18	4.96358e-17
FOXP3	5.14102	12.779	2.16971	2.2435e-18	5.0598e-17
MARCO	11.1229	-12.7761	-3.68969	2.26557e-18	5.1038e-17
PTPLAD2	9.2549	-12.7693	-1.56712	2.31727e-18	5.21438e-17
ABCA10	4.17502	-12.7654	-2.28341	2.34742e-18	5.27628e-17
DBF4	7.34328	12.7567	1.37696	2.41618e-18	5.42467e-17
C7orf58	8.57048	-12.7564	-2.16794	2.41888e-18	5.42467e-17
SELP	8.05675	-12.7467	-2.58328	2.49835e-18	5.5903e-17
C20orf46	5.89676	-12.7415	-2.04028	2.54182e-18	5.68119e-17
GIMAP7	8.88322	-12.7397	-1.87684	2.55708e-18	5.70889e-17
TNNT2	4.50251	-12.7391	-2.72579	2.56258e-18	5.71479e-17
ADARB1	9.60966	-12.7354	-1.72536	2.59388e-18	5.77813e-17
CHEK1	6.65044	12.7297	2.01069	2.64351e-18	5.88211e-17
SFTPC	14.9156	-12.7291	-8.10278	2.64864e-18	5.88694e-17
C10orf54	10.7599	-12.7271	-1.57636	2.66659e-18	5.92024e-17
TIMELESS	8.89183	12.7242	1.55763	2.69264e-18	5.97143e-17
TIMP1	12.4075	12.7234	1.65021	2.70018e-18	5.98149e-17
EME1	4.60363	12.7219	2.30864	2.71345e-18	6.00422e-17
MTHFD2	9.82526	12.7215	1.57654	2.71654e-18	6.00439e-17
C1orf106	9.4526	12.7034	2.00594	2.88606e-18	6.36497e-17
IL17D	4.90927	-12.6997	-2.05138	2.92168e-18	6.43509e-17
MRPL12	9.61333	12.6994	1.10803	2.92431e-18	6.43509e-17
TMEM178	5.82719	-12.6914	-2.34443	3.00409e-18	6.58883e-17
KCNN4	8.08593	12.691	3.25203	3.00775e-18	6.58961e-17
GARS	10.8651	12.6893	1.04006	3.02524e-18	6.62065e-17
MCM6	9.40858	12.688	1.45725	3.03825e-18	6.64184e-17
SYN2	4.07245	-12.6868	-3.21949	3.05003e-18	6.66029e-17
CES1	11.2966	-12.6842	-2.79244	3.07693e-18	6.71169e-17
RETN	5.46438	-12.6826	-4.16678	3.09386e-18	6.74124e-17
GPER	6.68127	-12.6778	-2.41354	3.14356e-18	6.84206e-17
C11orf80	7.74871	12.6756	1.17532	3.16627e-18	6.88397e-17
C8orf85	5.48437	-12.6703	-2.88704	3.22302e-18	6.99971e-17
CGREF1	4.47254	12.6607	3.3071	3.32819e-18	7.21241e-17
RHBDL2	5.99613	12.66	2.65552	3.33539e-18	7.22015e-17
FKBP11	8.87729	12.6511	1.66538	3.43693e-18	7.42385e-17
LSR	11.4811	12.649	1.14478	3.46048e-18	7.45855e-17
NFKBIL2	7.11217	12.6442	2.03966	3.51685e-18	7.56369e-17
ARAP2	9.69903	-12.6326	-1.22923	3.65597e-18	7.83754e-17
SLITRK2	3.64493	-12.6261	-2.92442	3.73622e-18	8.00097e-17
TMPRSS4	7.83233	12.6238	4.79771	3.76523e-18	8.05445e-17
EPHB2	8.24813	12.6115	2.24376	3.92349e-18	8.375e-17
HLA-E	14.0695	-12.6034	-1.21702	4.0309e-18	8.58591e-17
TPBG	8.72503	12.5976	1.80101	4.10988e-18	8.73548e-17
GFPT1	11.3589	12.5901	1.03565	4.21413e-18	8.92354e-17
SUV39H2	6.95186	12.59	1.29281	4.21627e-18	8.92354e-17
RSPO2	5.55391	-12.5888	-3.37821	4.23314e-18	8.94975e-17
P4HA3	5.54149	12.5881	2.50904	4.24377e-18	8.96271e-17
HPS5	9.88051	-12.5848	-1.04499	4.29054e-18	9.0519e-17
FUT8	9.41561	12.58	1.34621	4.36052e-18	9.18981e-17
KIAA0408	6.97907	-12.5785	-4.73762	4.38249e-18	9.22636e-17
CASQ2	4.96556	-12.5768	-3.17684	4.40646e-18	9.26704e-17
FLI1	9.55856	-12.5742	-1.64484	4.44535e-18	9.33899e-17
TMC2	2.49732	-12.5648	-2.466	4.58784e-18	9.61805e-17
PEBP4	8.53948	-12.553	-4.85981	4.77228e-18	9.96281e-17
MFSD2B	4.63651	12.551	1.82233	4.80585e-18	1.00224e-16
MSI2	7.33022	12.5452	1.54766	4.89884e-18	1.02057e-16
C7orf41	10.1246	-12.5394	-1.65184	4.99597e-18	1.03971e-16
SIDT2	10.6249	-12.5303	-1.13058	5.15084e-18	1.07083e-16
ACSS3	7.67813	-12.526	-2.18181	5.22565e-18	1.08412e-16
MMP1	6.85042	12.5186	5.0143	5.35731e-18	1.10912e-16
STOM	13.0457	-12.5124	-1.26149	5.46955e-18	1.13119e-16
MS4A15	7.99683	-12.5106	-5.27195	5.50272e-18	1.13569e-16
SH3GL2	4.2153	-12.5097	-3.53972	5.51917e-18	1.13791e-16
MOCS1	8.80635	-12.5038	-1.46012	5.6301e-18	1.15958e-16
CYP4B1	11.0354	-12.5027	-4.80302	5.65118e-18	1.16272e-16
ENTPD7	8.39229	12.5023	1.29469	5.659e-18	1.16313e-16
E2F3	8.55492	12.4996	1.46215	5.70957e-18	1.17231e-16
ITGA8	7.55212	-12.4965	-2.50297	5.7695e-18	1.182e-16
CNTFR	3.80842	-12.4963	-3.00736	5.77365e-18	1.182e-16
CD300C	6.99075	-12.4963	-2.07869	5.77454e-18	1.182e-16
NDRG2	10.1817	-12.4957	-1.81127	5.78483e-18	1.18289e-16
CHPF2	10.5975	12.4928	1.06589	5.84335e-18	1.19364e-16
ACOT11	6.86548	12.4908	1.56179	5.88234e-18	1.20037e-16
C6orf145	9.89634	-12.4852	-1.20864	5.99442e-18	1.22199e-16
PARK2	5.14373	-12.4815	-1.34831	6.06928e-18	1.23596e-16
UNC45B	3.27535	-12.4812	-2.41936	6.07535e-18	1.23596e-16
GAS6	11.7779	-12.4802	-1.87666	6.09485e-18	1.23866e-16
TMEM204	8.90038	-12.4766	-1.63021	6.17065e-18	1.25279e-16
PDK1	8.33182	12.4738	1.54099	6.22826e-18	1.2632e-16
PPP1R14A	7.65842	-12.4708	-1.89599	6.29166e-18	1.27347e-16
LOC84740	6.43366	12.4614	5.17267	6.49405e-18	1.31177e-16
PRR19	4.2126	12.4521	1.76248	6.70023e-18	1.35068e-16
LEPREL1	9.72026	-12.4502	-2.8273	6.74333e-18	1.358e-16
RAC3	6.62779	12.4407	1.86623	6.96137e-18	1.40049e-16
HSPC159	9.51347	-12.4318	-1.86187	7.17416e-18	1.44185e-16
SLC39A11	9.55446	12.4299	1.33823	7.21971e-18	1.44954e-16
MOSC2	8.47586	-12.4192	-1.62011	7.48503e-18	1.5013e-16
KCNAB1	6.35125	-12.4046	-1.83239	7.86281e-18	1.57549e-16
C5orf53	8.21731	-12.4004	-1.11007	7.97461e-18	1.59468e-16
MOGAT1	0.991141	-12.3943	-1.54426	8.1404e-18	1.62458e-16
ARAP3	9.12584	-12.3931	-1.30961	8.17374e-18	1.6296e-16
MARCKSL1	10.99	12.3885	1.97912	8.30357e-18	1.65248e-16
TSPAN7	9.73017	-12.3884	-2.78689	8.30507e-18	1.65248e-16
BMPER	6.08345	-12.375	-3.20294	8.6903e-18	1.72568e-16
ASNS	8.63967	12.3726	1.3723	8.76159e-18	1.73638e-16
IKBKE	7.91695	12.3713	1.13529	8.79959e-18	1.74218e-16
CENPE	6.23816	12.3636	2.62662	9.03234e-18	1.78494e-16
XYLB	5.63915	12.3604	1.59704	9.12895e-18	1.80024e-16
PODXL2	8.03823	12.3596	2.67371	9.15511e-18	1.80361e-16
SIGLEC11	5.27562	-12.3574	-2.96062	9.22174e-18	1.81494e-16
KIF15	5.28939	12.3499	2.96017	9.45848e-18	1.85759e-16
GINS4	6.16589	12.3497	2.32712	9.46636e-18	1.85759e-16
MFAP3L	7.29319	-12.3489	-2.08694	9.48963e-18	1.86032e-16
ABCC13	3.03462	-12.348	-2.583	9.52044e-18	1.86453e-16
PLSCR4	9.57609	-12.3459	-1.39431	9.58776e-18	1.87587e-16
GPRIN2	8.84122	-12.3404	-3.06926	9.76638e-18	1.90894e-16
POLE2	4.5844	12.3389	2.47822	9.81666e-18	1.91629e-16
FAM125B	9.51068	-12.3267	-1.6916	1.02324e-17	1.99027e-16
NUP155	8.74501	12.3259	1.37191	1.02583e-17	1.99338e-16
REEP1	6.47103	-12.3249	-2.38816	1.02927e-17	1.99718e-16
PAQR5	8.53704	-12.3248	-1.93534	1.02979e-17	1.99718e-16
LPCAT3	10.7602	-12.3177	-1.03626	1.05474e-17	2.04356e-16
GIMAP1	7.61571	-12.3154	-1.80753	1.06314e-17	2.05784e-16
POLQ	4.73677	12.3017	2.83437	1.11332e-17	2.14456e-16
MARVELD3	7.55753	12.3014	1.19967	1.11465e-17	2.14505e-16
TPI1	12.7379	12.2962	1.05612	1.13452e-17	2.1812e-16
CLSPN	5.25546	12.2943	3.05045	1.14184e-17	2.19314e-16
ADAM8	9.17701	12.2938	2.11159	1.14382e-17	2.19483e-16
LMCD1	10.0148	-12.2854	-1.39291	1.17667e-17	2.25138e-16
FGD3	8.55659	-12.2833	-1.46369	1.18491e-17	2.26279e-16
ALG3	9.52851	12.2829	1.04703	1.18665e-17	2.26394e-16
ZBTB47	8.86641	-12.2826	-1.09851	1.18797e-17	2.26429e-16
HTR3A	3.44207	12.2792	4.52177	1.2018e-17	2.28848e-16
BYSL	8.34754	12.2775	1.16956	1.20852e-17	2.29907e-16
EXOC3L	6.92039	-12.2757	-1.54421	1.21585e-17	2.31081e-16
SLC46A2	7.66907	-12.2752	-3.35813	1.21801e-17	2.31271e-16
C15orf42	4.94436	12.2737	2.51079	1.2241e-17	2.32206e-16
HHIP	7.97194	-12.2688	-4.04754	1.24492e-17	2.357e-16
DKK2	7.28209	-12.2661	-2.28209	1.25636e-17	2.37423e-16
ITPRIP	10.152	-12.2653	-1.39584	1.25974e-17	2.37836e-16
TRIM71	2.38395	-12.2609	-2.50036	1.27845e-17	2.40938e-16
HBA1	9.05556	-12.2609	-4.97466	1.27859e-17	2.40938e-16
C6orf129	7.4686	12.2566	1.37491	1.29741e-17	2.44253e-16
KIAA1324L	9.15552	-12.255	-2.36952	1.30425e-17	2.45145e-16
CENPI	3.91301	12.255	2.94971	1.3046e-17	2.45145e-16
LRRC32	10.4821	-12.2399	-2.01956	1.37308e-17	2.57527e-16
INSIG1	10.4595	-12.2383	-1.2297	1.38066e-17	2.58705e-16
PITX1	4.9501	12.2354	4.51668	1.39431e-17	2.61017e-16
CLIC3	8.85865	-12.234	-2.79422	1.40073e-17	2.61973e-16
KIAA0040	10.6376	-12.2173	-1.05564	1.4824e-17	2.76728e-16
NCAPG2	8.28865	12.2156	1.74921	1.49116e-17	2.78103e-16
LMNB1	8.8206	12.2115	1.81048	1.51195e-17	2.81718e-16
FANCD2	7.15945	12.2108	1.51862	1.51586e-17	2.82182e-16
SMTNL2	4.95755	-12.2091	-2.26479	1.52427e-17	2.83219e-16
ENG	12.3398	-12.1968	-1.49542	1.58973e-17	2.94408e-16
TMEM139	7.60056	-12.1967	-2.68814	1.5904e-17	2.94408e-16
TRIM59	7.07856	12.1908	1.53405	1.62249e-17	3.0007e-16
HEG1	11.7016	-12.1884	-1.88243	1.63566e-17	3.02226e-16
LTC4S	5.0631	-12.1877	-1.8614	1.63944e-17	3.02644e-16
AK1	10.739	-12.1859	-1.62114	1.64991e-17	3.04183e-16
KLF4	10.4041	-12.1857	-2.23886	1.65083e-17	3.04183e-16
SH3BP5	10.7725	-12.1837	-1.42244	1.66214e-17	3.05985e-16
PAQR4	8.47799	12.1812	1.30002	1.67648e-17	3.08339e-16
ADRA1D	4.00688	-12.1762	-2.21936	1.70518e-17	3.13117e-16
ID4	8.97485	-12.1761	-2.3139	1.7056e-17	3.13117e-16
MCM2	9.03384	12.1738	1.88503	1.71871e-17	3.15233e-16
TNNI2	4.92819	-12.1727	-2.57927	1.72513e-17	3.1612e-16
COX7A1	7.29702	-12.17	-1.76499	1.74129e-17	3.18789e-16
SNRPE	9.25294	12.167	1.07458	1.75942e-17	3.21517e-16
MIF	11.5939	12.1616	1.3196	1.79202e-17	3.27175e-16
F8	9.26911	-12.1539	-1.63031	1.83951e-17	3.35537e-16
DNASE2B	4.16783	-12.1533	-3.28046	1.8432e-17	3.35904e-16
MSL3L2	6.09425	12.1492	2.18476	1.86928e-17	3.40345e-16
VARS	10.7495	12.1474	1.19066	1.88046e-17	3.4207e-16
SKA1	5.06822	12.1471	2.86549	1.88231e-17	3.42094e-16
CBX3	11.457	12.1449	1.02183	1.89672e-17	3.44398e-16
SLCO5A1	3.46478	12.1397	2.55601	1.9307e-17	3.50249e-16
HMBS	8.47551	12.1376	1.0046	1.94425e-17	3.52387e-16
WIF1	9.02136	-12.1362	-5.15077	1.95407e-17	3.53845e-16
NTRK3	4.34938	-12.1332	-2.17564	1.97371e-17	3.56754e-16
C12orf49	10.3461	-12.1329	-1.19059	1.97579e-17	3.56806e-16
AMICA1	9.50346	-12.1303	-2.11791	1.99349e-17	3.59676e-16
RORA	9.0981	-12.1282	-1.34712	2.00809e-17	3.61938e-16
HS6ST2	7.41801	12.1279	3.41884	2.00966e-17	3.61938e-16
KCNK3	8.26552	-12.1267	-3.14174	2.01837e-17	3.6318e-16
PPIL1	9.0884	12.1163	1.07103	2.09094e-17	3.75559e-16
TNFSF12	9.80105	-12.1138	-1.19397	2.10906e-17	3.78374e-16
GIMAP5	9.6452	-12.1136	-1.96802	2.11041e-17	3.78374e-16
ZFYVE9	9.35739	-12.1121	-1.1291	2.12111e-17	3.79609e-16
ZNF239	6.00548	12.1087	1.41907	2.14604e-17	3.83727e-16
CCDC99	7.19503	12.1042	1.31843	2.17886e-17	3.89246e-16
ALOX5	10.6767	-12.0917	-2.05385	2.27398e-17	4.05813e-16
FRMD4A	9.15601	-12.0915	-1.31965	2.27567e-17	4.05813e-16
ZMYND15	7.08521	-12.0884	-1.63241	2.29994e-17	4.09775e-16
LDLR	11.8393	-12.0855	-1.99322	2.32264e-17	4.13451e-16
AOC2	4.54427	-12.0837	-1.3626	2.3373e-17	4.15689e-16
OGN	7.50352	-12.0803	-2.97798	2.36414e-17	4.19714e-16
SORD	8.48076	12.0754	1.29515	2.40395e-17	4.26401e-16
KIAA1024	4.1055	12.0689	1.75183	2.45829e-17	4.35653e-16
PCSK9	7.87692	-12.0668	-3.38142	2.47606e-17	4.38412e-16
LIFR	10.9991	-12.0612	-1.98582	2.52397e-17	4.46499e-16
ALAS2	3.15552	-12.0594	-2.82196	2.53961e-17	4.48866e-16
MAGED1	11.951	12.0581	1.01594	2.55036e-17	4.50367e-16
WISP1	6.38109	12.0455	2.39118	2.66331e-17	4.68241e-16
GPC3	9.66656	-12.0419	-2.65378	2.69554e-17	4.73489e-16
DENND2A	8.27206	-12.0415	-1.74473	2.69922e-17	4.73717e-16
CASC5	5.41638	12.0339	2.72665	2.77102e-17	4.85891e-16
GKN2	7.21243	-12.026	-5.4565	2.84629e-17	4.9865e-16
SNCA	6.33619	-12.0232	-1.66562	2.8743e-17	5.03116e-16
TARS2	8.91583	12.0156	1.00041	2.94978e-17	5.15423e-16
PITX2	2.36964	12.0148	3.9857	2.95766e-17	5.16347e-16
RAB11FIP1	12.8513	-12.0121	-1.5405	2.98486e-17	5.20641e-16
RBP4	7.23686	-12.0105	-3.37755	3.00166e-17	5.23112e-16
BOLA2	9.59435	12.0063	1.02991	3.04479e-17	5.30165e-16
PFKP	10.4097	11.9967	1.99046	3.14685e-17	5.47458e-16
FBXO22OS	5.33641	11.995	1.02528	3.16546e-17	5.50215e-16
CYP27B1	5.62724	11.9894	2.27095	3.22623e-17	5.60291e-16
CRY2	10.402	-11.9859	-1.30517	3.26568e-17	5.66647e-16
RAB19	3.61261	11.9821	1.65594	3.30867e-17	5.73608e-16
GALNT14	6.23596	11.977	3.524	3.36742e-17	5.8278e-16
DTYMK	8.45135	11.9742	1.15124	3.39877e-17	5.87695e-16
C11orf21	4.81137	-11.9723	-1.97136	3.42156e-17	5.91123e-16
CAMK2A	3.89291	-11.9697	-1.95305	3.45231e-17	5.9592e-16
DAB2IP	10.6134	-11.9615	-1.13614	3.55014e-17	6.11748e-16
PPP1R14D	3.30491	11.9544	4.27041	3.63839e-17	6.25873e-16
NOSTRIN	8.23948	-11.9539	-2.0707	3.64481e-17	6.26436e-16
LATS2	9.72228	-11.9452	-1.0174	3.75548e-17	6.44901e-16
AK3L1	6.21171	11.9348	2.82215	3.89172e-17	6.67147e-16
HIST1H2AM	1.55289	11.9321	1.99404	3.92776e-17	6.72747e-16
FGF10	1.88071	-11.9308	-2.38668	3.94526e-17	6.74537e-16
SUSD2	12.0523	-11.9306	-3.64847	3.94836e-17	6.74537e-16
RHBDL1	4.37283	11.9281	2.44304	3.98148e-17	6.79612e-16
MYH2	2.45443	-11.9257	-2.68993	4.01499e-17	6.84162e-16
BRI3BP	6.20936	11.9231	1.34334	4.05161e-17	6.89811e-16
KIAA0427	9.66819	-11.9071	-1.24689	4.27928e-17	7.27331e-16
MMACHC	6.61642	11.9054	1.14021	4.30443e-17	7.30984e-16
SMAD7	9.72744	-11.9042	-1.08925	4.32287e-17	7.33489e-16
PYCRL	8.14452	11.9019	1.21598	4.35666e-17	7.38595e-16
CRTAC1	9.80656	-11.8931	-3.71567	4.49074e-17	7.60032e-16
MSRB3	9.80557	-11.8852	-1.78674	4.61508e-17	7.80414e-16
CYS1	7.23334	-11.8824	-2.46093	4.65863e-17	7.86098e-16
DNAJC22	4.07058	11.8823	2.81801	4.66052e-17	7.86098e-16
C6orf105	7.04514	-11.8788	-2.5136	4.71798e-17	7.94446e-16
STYK1	5.93609	11.8775	2.26668	4.73854e-17	7.96885e-16
RNF182	5.42264	-11.8773	-2.68415	4.74105e-17	7.96885e-16
HDGF	12.5192	11.8771	1.01259	4.74446e-17	7.96885e-16
LMOD3	3.46344	-11.8742	-1.63432	4.79196e-17	8.04186e-16
PIP5K1B	8.15474	-11.8717	-2.63667	4.83339e-17	8.09775e-16
KIAA1683	7.26953	-11.8714	-2.88064	4.83887e-17	8.10013e-16
EFHA2	6.18022	-11.8681	-1.43243	4.89488e-17	8.18702e-16
SEPT10	10.7925	-11.851	-1.06763	5.19143e-17	8.66122e-16
VWF	13.091	-11.8435	-2.19705	5.32731e-17	8.88048e-16
SEMA3B	9.72248	-11.8284	-2.58022	5.61147e-17	9.33076e-16
ABCA3	12.8253	-11.8266	-2.96702	5.64566e-17	9.37979e-16
PCDH9	6.07333	-11.822	-2.6686	5.73676e-17	9.52322e-16
FER1L4	4.89213	11.82	3.40726	5.77628e-17	9.58083e-16
ALDOA	14.1546	11.8184	1.12846	5.80808e-17	9.62337e-16
LILRA2	6.69464	-11.8178	-1.73615	5.8208e-17	9.62337e-16
TCP11L2	7.7758	-11.8178	-1.19861	5.82123e-17	9.62337e-16
CD34	10.6765	-11.8117	-1.39077	5.94384e-17	9.81793e-16
ZC3H8	6.1988	11.8042	1.02648	6.09961e-17	1.00586e-15
CDK1	7.99148	11.8001	2.19956	6.18751e-17	1.01867e-15
ST6GALNAC3	6.56368	-11.793	-1.89891	6.34155e-17	1.04145e-15
CABYR	4.91218	11.7915	3.37617	6.37364e-17	1.04585e-15
PTGFRN	10.3803	11.7841	1.37511	6.53876e-17	1.07119e-15
COL11A1	5.48504	11.7827	6.35008	6.57025e-17	1.07458e-15
RDM1	1.83819	11.7768	2.43067	6.7048e-17	1.09568e-15
MYOZ1	5.44548	-11.7758	-2.82443	6.72789e-17	1.09814e-15
GNG11	10.1007	-11.7757	-1.95479	6.73082e-17	1.09814e-15
TTN	7.64246	-11.771	-1.72296	6.84124e-17	1.11524e-15
MDGA1	7.44092	-11.7688	-2.16194	6.89321e-17	1.12244e-15
SORBS3	10.9594	-11.7687	-1.18539	6.89665e-17	1.12244e-15
MMRN1	8.42978	-11.7651	-2.40737	6.98123e-17	1.13528e-15
CBX8	6.80578	11.7615	1.17597	7.06963e-17	1.14871e-15
ZNF385B	8.18749	-11.7612	-3.2542	7.07696e-17	1.14897e-15
C1QTNF6	8.03707	11.7587	2.20341	7.13843e-17	1.15801e-15
CMTM2	3.50938	-11.7577	-2.01346	7.1623e-17	1.1603e-15
BMP8A	6.50576	11.7576	2.32208	7.16424e-17	1.1603e-15
NTN4	10.8203	-11.7539	-1.75209	7.25758e-17	1.17278e-15
MSR1	11.2613	-11.7538	-2.37113	7.25894e-17	1.17278e-15
ACOXL	6.244	-11.7507	-3.26365	7.33703e-17	1.18444e-15
CELF2	11.0224	-11.7505	-1.3193	7.34312e-17	1.18446e-15
RUSC1	9.53118	11.7466	1.03249	7.44278e-17	1.19957e-15
RPH3A	2.6803	-11.7304	-2.16397	7.87266e-17	1.26534e-15
CALU	12.0847	11.7302	1.17312	7.87625e-17	1.26534e-15
N4BP2L1	8.42046	-11.7295	-1.5666	7.89581e-17	1.26746e-15
CCDC152	6.45981	-11.7264	-1.58579	7.98039e-17	1.28001e-15
ZC3HAV1L	5.00403	11.7253	1.50316	8.01263e-17	1.28415e-15
C19orf40	5.03059	11.7244	1.28977	8.03692e-17	1.287e-15
CACNB4	6.36724	-11.7201	-2.37763	8.15889e-17	1.30549e-15
RAB26	3.44113	11.7155	2.73794	8.28708e-17	1.32388e-15
NRN1	7.83751	-11.7098	-2.18944	8.45301e-17	1.3493e-15
HPSE2	3.23076	-11.707	-2.4321	8.53524e-17	1.36025e-15
ZNF217	10.1505	11.7057	1.10865	8.57467e-17	1.36544e-15
PPP4R4	4.88064	-11.7049	-2.99335	8.59874e-17	1.36818e-15
RICH2	9.37176	-11.7038	-2.19195	8.6308e-17	1.37219e-15
GABARAPL1	10.9304	-11.7011	-1.19202	8.71134e-17	1.38389e-15
SNX22	8.27678	-11.7	-1.23646	8.74464e-17	1.38807e-15
OTX1	3.82514	11.697	3.0215	8.83582e-17	1.3992e-15
CNFN	3.92308	11.69	2.32279	9.05455e-17	1.43157e-15
BZW2	10.2488	11.6889	1.28632	9.08724e-17	1.43395e-15
ANXA3	10.8756	-11.6888	-2.117	9.09117e-17	1.43395e-15
PTGES	8.05735	11.686	2.54742	9.18027e-17	1.44685e-15
TMEM90A	4.6677	-11.6836	-2.95483	9.25655e-17	1.45772e-15
ABHD6	7.92473	-11.6823	-1.22074	9.29772e-17	1.46305e-15
TMEM48	7.91778	11.6804	1.19242	9.36102e-17	1.47185e-15
RUNX2	7.68009	11.6797	1.67441	9.38333e-17	1.47304e-15
FLJ11235	4.39117	-11.6774	-1.2513	9.45888e-17	1.48373e-15
C1orf135	4.44629	11.6767	2.06361	9.47916e-17	1.48574e-15
CA9	4.29468	11.6757	5.42962	9.51305e-17	1.48988e-15
RPGR	7.89258	-11.6715	-1.09699	9.65267e-17	1.50957e-15
TSPAN12	10.1866	-11.6715	-1.62824	9.65392e-17	1.50957e-15
S100A3	5.64655	-11.6655	-2.19076	9.85537e-17	1.53986e-15
PLAC2	6.30801	-11.6641	-3.11056	9.90329e-17	1.54614e-15
CD300LF	8.10759	-11.6609	-2.11054	1.00142e-16	1.56223e-15
FGFR2	9.63455	-11.6588	-2.25555	1.0088e-16	1.57006e-15
HPCAL1	11.1412	-11.6508	-1.19892	1.03717e-16	1.61045e-15
CNRIP1	7.99368	-11.6499	-1.29117	1.04027e-16	1.61399e-15
LRRK2	11.3064	-11.6468	-3.30417	1.0515e-16	1.63014e-15
LGI2	6.45222	11.6463	2.33855	1.05362e-16	1.63217e-15
MAGI3	10.0848	-11.645	-1.27435	1.05816e-16	1.63793e-15
ANXA8L2	7.364	-11.6416	-3.94134	1.07072e-16	1.65609e-15
REM1	5.23896	-11.6409	-1.57996	1.07333e-16	1.65884e-15
OR2A9P	7.349	-11.6379	-1.09147	1.08469e-16	1.6738e-15
EMR1	6.28963	-11.6358	-3.16117	1.09245e-16	1.68447e-15
SCN1A	5.98225	-11.6297	-3.2458	1.11601e-16	1.71947e-15
FANCG	7.63674	11.628	1.09174	1.12267e-16	1.7284e-15
TACC3	8.94132	11.6231	1.524	1.14176e-16	1.75642e-15
BPHL	8.12962	11.6226	1.17838	1.14373e-16	1.7581e-15
TMOD1	8.03646	-11.6213	-1.68532	1.14922e-16	1.76382e-15
KNTC1	7.57307	11.6165	1.96331	1.16817e-16	1.79015e-15
SEMA4B	11.0663	11.6141	1.44036	1.17793e-16	1.80372e-15
COL1A1	13.983	11.6138	3.18812	1.17925e-16	1.80436e-15
ARHGEF6	9.68748	-11.6111	-1.48817	1.19036e-16	1.81898e-15
PCYOX1	11.8945	-11.6095	-1.08245	1.1971e-16	1.82745e-15
SLIT3	9.64226	-11.6086	-2.39619	1.20067e-16	1.83049e-15
C2CD4A	5.32995	11.6086	3.29007	1.20093e-16	1.83049e-15
TTYH3	10.93	11.6075	1.58686	1.20534e-16	1.83582e-15
MAPK4	6.2233	-11.6057	-3.73534	1.21287e-16	1.84587e-15
ALDH2	12.825	-11.6049	-1.62913	1.2166e-16	1.85014e-15
CCL23	5.3448	-11.6033	-2.83763	1.22308e-16	1.85857e-15
KAT2B	9.35066	-11.6016	-1.2586	1.23039e-16	1.86827e-15
ZWILCH	7.83148	11.5983	1.12075	1.24452e-16	1.88828e-15
COCH	5.38009	11.5918	3.32229	1.27309e-16	1.9287e-15
LMO7	12.8858	-11.5852	-1.57465	1.30274e-16	1.97211e-15
TSPAN18	9.37773	-11.5843	-1.72911	1.30666e-16	1.97655e-15
HN1L	11.1925	11.5838	1.03389	1.30882e-16	1.97831e-15
ABCG1	10.3019	-11.5834	-1.41928	1.31093e-16	1.98e-15
RCAN1	10.4524	-11.5783	-1.46325	1.33411e-16	2.01196e-15
PRICKLE2	9.34238	-11.578	-1.44078	1.33558e-16	2.01266e-15
VSIG4	10.8973	-11.5765	-2.53633	1.34258e-16	2.02168e-15
RCCD1	7.1001	11.5759	1.00859	1.34554e-16	2.0246e-15
PAX6	5.36598	-11.5737	-1.51945	1.3557e-16	2.03836e-15
GANC	8.96774	-11.5679	-1.08074	1.38337e-16	2.07839e-15
MPP6	5.81517	11.5656	1.71164	1.39479e-16	2.09239e-15
PGR	6.541	-11.5553	-1.87222	1.44531e-16	2.16493e-15
E2F2	5.68219	11.5525	2.1824	1.45981e-16	2.18336e-15
SNX25	9.84047	-11.55	-1.54926	1.47239e-16	2.20053e-15
NEDD9	12.1971	-11.5475	-1.72263	1.48532e-16	2.21653e-15
BRIX1	9.14201	11.5447	1.04675	1.50002e-16	2.23679e-15
CXCR2	6.26059	-11.5402	-2.24948	1.52357e-16	2.27021e-15
FAM13C	7.27446	-11.54	-1.87494	1.52478e-16	2.27031e-15
ERBB4	6.36515	-11.5343	-2.97741	1.55516e-16	2.31305e-15
AFAP1L1	8.78213	-11.5342	-1.57928	1.5558e-16	2.31305e-15
LOC100144604	2.97584	-11.5334	-2.56711	1.56011e-16	2.31773e-15
SLC2A5	5.53172	11.5287	2.88738	1.58553e-16	2.35278e-15
DUS4L	6.87933	11.5287	1.02939	1.58607e-16	2.35278e-15
FLJ37543	1.18304	-11.5216	-1.31488	1.62565e-16	2.40971e-15
PSMG3	8.72241	11.519	1.2223	1.64061e-16	2.43008e-15
TSPAN6	9.78132	11.5178	1.23971	1.64729e-16	2.43815e-15
TMEM150B	5.93042	-11.5139	-2.24275	1.66964e-16	2.46758e-15
CCNE2	6.14604	11.5135	2.0651	1.67223e-16	2.46958e-15
LYPD3	6.42851	11.5096	2.70624	1.69488e-16	2.50117e-15
CLEC4M	2.76951	-11.5073	-3.34587	1.70879e-16	2.51983e-15
FABP5	7.87576	-11.5026	-2.10394	1.7366e-16	2.55896e-15
NFIX	11.2135	-11.4913	-1.64637	1.80697e-16	2.65089e-15
MEFV	5.27469	-11.491	-1.86992	1.80842e-16	2.65106e-15
ADAMTS1	10.6516	-11.4906	-2.09365	1.81136e-16	2.65342e-15
CLDN12	10.0145	11.4889	1.13857	1.82162e-16	2.6665e-15
LOC338758	5.22499	-11.4831	-1.35582	1.85898e-16	2.71919e-15
BMPR2	11.7701	-11.4792	-1.18921	1.88442e-16	2.75437e-15
ZNF366	5.69682	-11.4741	-1.80864	1.91885e-16	2.80265e-15
FIGNL1	7.63312	11.4708	1.42927	1.94048e-16	2.83216e-15
DUOXA1	8.05716	-11.468	-3.12472	1.95968e-16	2.8561e-15
C6orf174	7.74597	-11.468	-2.77035	1.95974e-16	2.8561e-15
DAPK1	11.2212	-11.4636	-1.4225	1.99004e-16	2.89463e-15
PROS1	10.6097	-11.4635	-1.63829	1.99054e-16	2.89463e-15
P2RX2	2.98698	-11.4602	-2.49198	2.01396e-16	2.92656e-15
MS4A2	7.12928	-11.4598	-2.38631	2.01692e-16	2.92872e-15
GPR115	3.87936	11.4504	3.79558	2.08398e-16	3.02389e-15
CCDC69	10.6423	-11.4498	-1.48268	2.08831e-16	3.02798e-15
ABCA9	6.21743	-11.4477	-2.32177	2.10357e-16	3.04567e-15
PREX2	5.97873	-11.4433	-2.39872	2.13625e-16	3.09075e-15
COL4A3	8.32804	-11.4319	-3.36254	2.22302e-16	3.20929e-15
RASGEF1B	8.98498	-11.4298	-1.41339	2.23955e-16	3.2263e-15
SRL	4.62613	-11.4298	-1.94855	2.23965e-16	3.2263e-15
SVEP1	9.78794	-11.4178	-2.01307	2.33615e-16	3.36046e-15
DGCR5	4.67115	11.4146	2.85563	2.36192e-16	3.39507e-15
COL3A1	13.8803	11.402	2.85968	2.46829e-16	3.54031e-15
MAGI1	9.17762	-11.3994	-1.28976	2.4913e-16	3.57074e-15
RGS9BP	3.61764	-11.3925	-2.08512	2.55246e-16	3.65053e-15
PRR11	5.14451	11.3879	2.59716	2.59374e-16	3.70691e-15
NCRNA00092	4.26726	-11.3814	-2.22149	2.65367e-16	3.78984e-15
C21orf45	7.26777	11.3724	1.13342	2.73809e-16	3.9076e-15
IRX1	5.1277	-11.3694	-3.515	2.76727e-16	3.94453e-15
SOX5	4.92864	-11.3693	-1.92918	2.76792e-16	3.94453e-15
CKAP4	11.0498	11.3664	1.03331	2.79684e-16	3.9829e-15
EEF1A2	5.67736	11.3641	4.77277	2.8191e-16	4.00887e-15
MAST1	3.15326	11.3601	2.40806	2.8592e-16	4.063e-15
CDC25A	5.18576	11.3584	2.26451	2.87588e-16	4.08379e-15
APOB48R	9.1187	-11.3514	-1.87419	2.94735e-16	4.17933e-15
PSAPL1	3.06653	-11.345	-2.63249	3.0147e-16	4.26654e-15
MRC1	11.6101	-11.3415	-2.55361	3.05197e-16	4.31541e-15
LAMB2	12.1803	-11.3202	-1.11819	3.28899e-16	4.63738e-15
MYL9	12.4682	-11.3181	-1.67311	3.31294e-16	4.66456e-15
LIMK1	10.3678	11.3113	1.23225	3.39242e-16	4.76973e-15
CHRDL1	9.38342	-11.3104	-2.89807	3.40363e-16	4.78211e-15
NOS1	3.81449	-11.3101	-3.43346	3.40755e-16	4.78384e-15
C16orf86	5.39263	-11.3066	-1.19259	3.4489e-16	4.83549e-15
FRMD4B	9.716	-11.3064	-1.1256	3.45171e-16	4.83604e-15
RNASEH2A	8.06377	11.3036	1.21911	3.48546e-16	4.87988e-15
ARHGAP11A	7.36647	11.3032	1.95143	3.49083e-16	4.88397e-15
CA3	6.19198	-11.3017	-2.70367	3.50923e-16	4.90628e-15
HMGCLL1	4.99589	-11.2972	-2.2153	3.56504e-16	4.97385e-15
ADAM12	7.26529	11.2882	2.9908	3.68025e-16	5.12382e-15
PLCE1	8.58895	-11.2769	-1.83901	3.82868e-16	5.31563e-15
PDLIM1	12.0027	-11.2706	-1.08895	3.91488e-16	5.42397e-15
ITPKA	4.46512	11.2703	3.9523	3.91891e-16	5.42579e-15
PRDM12	0.966408	11.2699	1.38935	3.9241e-16	5.4292e-15
CENPK	5.38667	11.2653	2.13511	3.98889e-16	5.51502e-15
RMST	1.42889	-11.2644	-1.89321	4.00065e-16	5.52745e-15
SHANK3	9.40527	-11.2573	-1.40598	4.1026e-16	5.66437e-15
WNT7A	5.69571	-11.2536	-3.50045	4.15662e-16	5.73102e-15
ZNF536	2.00705	-11.2532	-2.08972	4.16155e-16	5.73385e-15
MYOM2	5.19399	-11.253	-1.88756	4.1645e-16	5.73396e-15
HOXA4	5.88253	-11.2518	-1.90784	4.18202e-16	5.75411e-15
WDHD1	7.06749	11.2491	1.71383	4.2217e-16	5.80069e-15
SRM	9.76149	11.2481	1.00475	4.23668e-16	5.81726e-15
P2RY1	6.20524	-11.2374	-1.5809	4.39908e-16	6.03195e-15
RASGRP2	7.20204	-11.2313	-1.90186	4.49495e-16	6.15493e-15
RASL12	8.67659	-11.231	-1.55212	4.50078e-16	6.15868e-15
TEX14	3.87644	-11.2271	-1.93154	4.56187e-16	6.23372e-15
ONECUT1	1.29863	11.2256	2.51171	4.58699e-16	6.26376e-15
EHD2	12.1622	-11.2242	-1.33982	4.6091e-16	6.28963e-15
HK3	8.82824	-11.2186	-2.12717	4.70179e-16	6.41174e-15
RECK	8.51942	-11.2179	-1.46255	4.71317e-16	6.42286e-15
AQP4	11.5237	-11.2078	-4.45429	4.88387e-16	6.63282e-15
FAM155B	4.03704	11.2067	2.74741	4.90224e-16	6.65323e-15
EML1	8.74554	-11.2029	-1.6773	4.96868e-16	6.73423e-15
C1orf69	7.96982	-11.2017	-1.0043	4.98963e-16	6.75345e-15
PCDHGB7	7.77134	-11.2013	-1.79099	4.99735e-16	6.7593e-15
ANO7	4.20059	11.1989	1.63002	5.03946e-16	6.81164e-15
RFC4	7.41787	11.1917	1.54293	5.16956e-16	6.98276e-15
BCL9	9.38449	11.1881	1.30567	5.23498e-16	7.06634e-15
METTL1	8.17046	11.1858	1.36808	5.27766e-16	7.11912e-15
AQP11	3.84099	11.1786	1.61463	5.41241e-16	7.29102e-15
MTFR1	8.87483	11.1784	1.16556	5.41712e-16	7.29245e-15
ODF3L1	4.2362	-11.1769	-2.4051	5.44544e-16	7.32562e-15
PDE1B	7.0678	-11.1751	-1.88732	5.48107e-16	7.36362e-15
IDH2	10.7368	11.1682	1.04301	5.61488e-16	7.53323e-15
PION	9.57988	-11.1653	-1.29142	5.67378e-16	7.60203e-15
HBG1	2.54008	-11.1628	-2.53213	5.724e-16	7.65901e-15
PLA2G3	5.09859	-11.1622	-3.30813	5.73498e-16	7.66856e-15
BTNL8	3.56316	-11.1592	-2.5997	5.79649e-16	7.74043e-15
C5orf34	4.60994	11.1542	1.97778	5.90029e-16	7.87377e-15
SYT12	4.98654	11.1537	4.46491	5.91138e-16	7.87802e-15
RAD51AP1	6.26611	11.1529	1.84996	5.92752e-16	7.89426e-15
GMFG	9.3366	-11.1491	-1.54029	6.00831e-16	7.9965e-15
GSG1L	1.65699	-11.1462	-1.97514	6.0681e-16	8.07069e-15
OSTBETA	3.77057	-11.1359	-3.00391	6.29356e-16	8.35385e-15
MMP12	5.92361	11.1214	4.38588	6.62404e-16	8.78081e-15
CFL2	9.79383	-11.1203	-1.37484	6.65032e-16	8.8098e-15
C5AR1	9.82698	-11.1092	-1.82895	6.91708e-16	9.15709e-15
ZNF485	5.27734	11.1078	1.0721	6.95092e-16	9.19578e-15
SLC12A4	10.4509	-11.1068	-1.0047	6.97516e-16	9.22173e-15
ASPRV1	5.2186	-11.1054	-1.2836	7.00943e-16	9.26091e-15
SULT1A2	6.4743	-11.1029	-2.21433	7.073e-16	9.33871e-15
RILP	8.44821	-11.1012	-1.18098	7.11644e-16	9.38984e-15
C15orf59	5.29241	-11.0983	-2.03679	7.18989e-16	9.47421e-15
FZD4	10.2026	-11.0964	-1.56037	7.23761e-16	9.52462e-15
TRIM58	5.04891	-11.0916	-2.91695	7.36168e-16	9.68139e-15
GCNT3	6.22461	11.0885	3.77247	7.44148e-16	9.77425e-15
UNC5CL	6.20609	11.0885	2.44879	7.4421e-16	9.77425e-15
CHPF	11.0378	11.0845	1.24881	7.54941e-16	9.90866e-15
SLC31A2	9.46794	-11.082	-1.39406	7.61464e-16	9.9877e-15
TEF	9.69979	-11.0774	-1.20637	7.7403e-16	1.01458e-14
NCRNA00152	7.26764	11.0738	1.41328	7.84011e-16	1.02632e-14
FBXO43	2.72551	11.0724	1.77426	7.87928e-16	1.03077e-14
PRKCH	10.0678	-11.07	-1.02143	7.9474e-16	1.039e-14
NEGR1	7.15321	-11.0672	-1.97007	8.02496e-16	1.04708e-14
NDRG4	7.94043	-11.0555	-2.5564	8.3667e-16	1.08882e-14
TRAIP	5.29181	11.047	1.81265	8.62197e-16	1.12057e-14
VWC2	1.61169	-11.0455	-1.78566	8.66779e-16	1.1258e-14
RHBG	1.58131	11.0435	2.41712	8.72929e-16	1.13305e-14
C12orf48	5.76584	11.0335	1.76462	9.04462e-16	1.17169e-14
UBL3	11.0463	-11.0259	-1.13952	9.29058e-16	1.20199e-14
GP9	1.62524	-11.0246	-2.04347	9.33428e-16	1.20686e-14
KISS1R	1.90634	11.0225	3.14446	9.40393e-16	1.21508e-14
TAPT1	9.84312	-11.0218	-1.09431	9.42601e-16	1.21714e-14
CPAMD8	9.3641	-11.0209	-2.74282	9.45765e-16	1.22043e-14
COL24A1	4.32541	11.0182	1.8777	9.54747e-16	1.23123e-14
SLC25A25	9.77201	-11.015	-1.3356	9.6586e-16	1.24475e-14
C11orf9	9.78638	-11.0137	-2.88084	9.70189e-16	1.24953e-14
POC1A	6.60669	11.0114	1.46047	9.78309e-16	1.25917e-14
SIGLEC16	3.70111	-11.0069	-2.01168	9.93994e-16	1.27853e-14
DDO	5.88396	-11.0062	-1.85479	9.9647e-16	1.28089e-14
COL5A2	10.8021	11.0025	2.29545	1.00958e-15	1.2969e-14
C10orf105	3.96984	-11.002	-1.82575	1.01129e-15	1.29827e-14
PRKCZ	10.201	-10.9998	-1.35699	1.01944e-15	1.30704e-14
NMU	2.8583	10.9982	3.69981	1.02491e-15	1.31238e-14
PARD6B	8.94953	-10.9964	-1.29003	1.03158e-15	1.32007e-14
C1orf21	10.0061	-10.9955	-1.50059	1.03494e-15	1.32351e-14
CRIM1	11.3445	-10.9946	-1.37354	1.03812e-15	1.32674e-14
DOK7	5.74073	-10.9861	-2.23173	1.07006e-15	1.36668e-14
TMTC4	8.51029	10.9818	1.05146	1.08643e-15	1.38669e-14
TTC28	9.55792	-10.9811	-1.25369	1.08923e-15	1.38938e-14
EFEMP1	11.857	-10.9779	-1.90885	1.10161e-15	1.40427e-14
ZNF365	6.0985	-10.9771	-2.02206	1.10478e-15	1.40741e-14
LOC728554	7.11181	10.9742	1.21688	1.11609e-15	1.42091e-14
THRA	9.46637	-10.9677	-1.1253	1.14216e-15	1.45132e-14
TRPC2	2.31191	-10.9654	-1.86731	1.15154e-15	1.46138e-14
RFX2	8.35823	-10.948	-1.92853	1.22517e-15	1.55087e-14
PAPSS2	11.3857	-10.9474	-1.56557	1.22773e-15	1.55313e-14
FAM124B	5.70739	-10.9452	-1.66164	1.23764e-15	1.56367e-14
FGD4	9.49669	-10.9414	-1.02035	1.25415e-15	1.58353e-14
PDE1C	4.95339	-10.9327	-2.27488	1.29368e-15	1.63034e-14
RAB40AL	3.05532	-10.9288	-1.51947	1.31163e-15	1.65089e-14
OR2W3	2.26743	-10.923	-2.04242	1.33935e-15	1.68047e-14
DNAJC12	5.71418	10.9206	2.90684	1.35063e-15	1.69355e-14
TLE4	8.80571	-10.9188	-1.04277	1.35941e-15	1.70242e-14
LRRTM4	2.84169	-10.915	-2.25784	1.37801e-15	1.72355e-14
NEDD4L	11.4453	-10.9102	-1.36182	1.40141e-15	1.75062e-14
RAPGEF3	8.2766	-10.909	-1.34979	1.40773e-15	1.75741e-14
SMAD9	5.85712	-10.9045	-2.17156	1.43039e-15	1.78459e-14
LOC572558	1.45621	-10.9033	-1.60388	1.43643e-15	1.791e-14
SRRM3	5.15076	10.9017	2.11815	1.44499e-15	1.80054e-14
PTGFR	6.31441	-10.8954	-2.23348	1.47762e-15	1.83777e-14
KRT80	8.87265	10.8921	2.38102	1.49492e-15	1.85812e-14
PLEKHO2	10.7286	-10.8897	-1.04666	1.50787e-15	1.87188e-14
LPGAT1	10.6368	10.8874	1.05087	1.52011e-15	1.88473e-14
PODNL1	6.24118	10.88	2.30471	1.56097e-15	1.93178e-14
JDP2	9.74222	-10.8772	-1.36985	1.57631e-15	1.94835e-14
OIP5	4.38605	10.8769	2.29865	1.57834e-15	1.94966e-14
AKAP7	7.19731	-10.8731	-1.12679	1.59983e-15	1.97375e-14
CTNNAL1	10.1634	-10.8721	-1.31341	1.60574e-15	1.97981e-14
LPHN2	10.4987	-10.8711	-1.68374	1.61106e-15	1.98515e-14
MGC87042	4.20039	10.8708	2.16666	1.61303e-15	1.98635e-14
CCDC150	2.93676	10.8618	2.05782	1.66527e-15	2.04815e-14
RXFP2	0.792491	-10.8527	-1.19396	1.72034e-15	2.11458e-14
CCBE1	6.79605	-10.8506	-2.67027	1.73353e-15	2.12948e-14
TMEM132C	3.72905	-10.8502	-2.96328	1.73601e-15	2.13121e-14
CST5	3.41223	-10.8432	-2.52833	1.77968e-15	2.18347e-14
TSLP	4.39214	-10.8412	-2.01823	1.79233e-15	2.19764e-14
BEST1	6.09129	-10.8368	-1.24919	1.82088e-15	2.2299e-14
TUBA1C	11.8501	10.8363	1.12044	1.82419e-15	2.23259e-14
SFTPD	12.1762	-10.8336	-4.12261	1.84201e-15	2.25302e-14
NKAIN1	1.94429	10.8314	2.55736	1.85619e-15	2.26897e-14
C1orf115	9.55127	-10.8229	-1.84193	1.9136e-15	2.33343e-14
LAD1	10.4058	10.8046	1.78028	2.0432e-15	2.48235e-14
MUSK	2.62793	-10.8001	-2.13435	2.07616e-15	2.51778e-14
CKS1B	8.78315	10.7993	1.53428	2.08187e-15	2.52317e-14
IL33	9.94691	-10.7952	-2.38778	2.11266e-15	2.55894e-14
MMP13	4.41064	10.7929	5.17783	2.12994e-15	2.57829e-14
NCF2	10.4642	-10.7922	-1.59641	2.13584e-15	2.58387e-14
TSKU	9.60309	10.7917	1.5758	2.13963e-15	2.58689e-14
SRPX2	7.79495	10.7895	2.26232	2.15615e-15	2.6037e-14
CA2	9.27435	-10.7856	-2.35808	2.1867e-15	2.639e-14
LY6G6F	0.900461	-10.7765	-1.53514	2.25851e-15	2.72402e-14
GATA2	8.64646	-10.7748	-2.03676	2.27233e-15	2.73902e-14
DOCK9	11.1341	-10.7716	-1.02044	2.2984e-15	2.76877e-14
SERPINH1	11.9596	10.7713	1.12789	2.30134e-15	2.77064e-14
STAC	7.84433	-10.7625	-2.54916	2.37443e-15	2.85519e-14
CDH3	9.52179	10.7597	2.82576	2.39881e-15	2.88276e-14
CAPN3	7.24427	-10.7594	-2.20667	2.40165e-15	2.88444e-14
BCL2L10	1.31888	10.7578	1.97946	2.41527e-15	2.89906e-14
ATAD3A	8.96959	10.7476	1.03847	2.50451e-15	3.00075e-14
FBP1	11.507	-10.746	-1.92124	2.51915e-15	3.01648e-14
BCL2L15	6.09075	10.7366	2.94509	2.6058e-15	3.11275e-14
HIST1H2BD	7.14105	10.735	2.04371	2.62098e-15	3.12901e-14
BST1	7.3634	-10.7334	-1.32494	2.63539e-15	3.14433e-14
KRT1	2.66835	-10.7318	-1.95326	2.65109e-15	3.16117e-14
MMP19	9.49011	-10.7308	-1.41001	2.66001e-15	3.16992e-14
LASS6	9.47423	10.7242	1.03223	2.72439e-15	3.24469e-14
CACNA2D2	10.5088	-10.7172	-4.09654	2.79306e-15	3.32251e-14
TTC39C	8.465	10.708	1.24215	2.88704e-15	3.42926e-14
SYNPO2L	3.69479	-10.7077	-2.64237	2.88971e-15	3.4293e-14
AG2	9.82484	-10.7045	-1.88588	2.92305e-15	3.4668e-14
PRCD	3.57779	-10.7005	-1.4204	2.96571e-15	3.5153e-14
CCND2	10.2338	-10.6987	-1.39464	2.98447e-15	3.53544e-14
EGLN3	8.44982	10.6937	2.40574	3.03821e-15	3.59696e-14
BAIAP2L1	10.2466	10.6927	1.05102	3.04974e-15	3.60847e-14
CD302	11.0488	-10.686	-1.64899	3.12418e-15	3.69435e-14
DIXDC1	8.98001	-10.6773	-1.17686	3.22241e-15	3.80599e-14
GPR133	9.46573	-10.6764	-2.53951	3.23299e-15	3.81623e-14
FAM65A	10.6912	-10.6756	-1.20934	3.243e-15	3.82352e-14
TFAP4	7.37084	10.6721	1.18799	3.28379e-15	3.86703e-14
MYEOV	4.17234	10.666	3.9784	3.3558e-15	3.94718e-14
KCNIP1	3.21697	-10.6635	-1.88818	3.38625e-15	3.97595e-14
CD97	11.8494	-10.6614	-1.34557	3.41178e-15	4.00357e-14
IL22RA2	2.51305	10.66	3.09636	3.42952e-15	4.01966e-14
AQP10	2.00859	-10.6582	-1.88274	3.45185e-15	4.04107e-14
DCC	3.95656	-10.6568	-2.57867	3.46837e-15	4.05804e-14
SYT7	8.07148	10.6434	2.50708	3.64062e-15	4.25457e-14
GGTLC1	7.67892	-10.6354	-3.43457	3.74654e-15	4.37323e-14
ARHGAP30	10.1609	-10.6349	-1.23282	3.75316e-15	4.3784e-14
SPI1	10.2896	-10.6346	-1.68029	3.75668e-15	4.37994e-14
GAD1	3.0477	10.6342	2.82771	3.76228e-15	4.3839e-14
ZBED2	7.28253	-10.634	-2.60787	3.76475e-15	4.3841e-14
CDCA4	7.94654	10.6339	1.3252	3.76684e-15	4.3841e-14
THNSL1	7.35273	10.6307	1.03178	3.80945e-15	4.42851e-14
P2RX6	3.08172	-10.6293	-2.06378	3.82977e-15	4.44955e-14
ZEB2	10.39	-10.6287	-1.36034	3.83772e-15	4.45618e-14
ADCY9	10.2529	-10.6273	-1.38286	3.85613e-15	4.47453e-14
TNFSF13	11.0008	-10.6272	-1.25387	3.85801e-15	4.47453e-14
DLG5	9.91059	10.6248	1.22818	3.89219e-15	4.50981e-14
C4orf38	3.90756	-10.6247	-1.4721	3.89295e-15	4.50981e-14
ALDH1A2	7.25003	-10.6239	-2.60168	3.90454e-15	4.52061e-14
KCNE1	5.74578	-10.6173	-2.69773	3.99752e-15	4.61753e-14
MYADM	12.3823	-10.6151	-1.69386	4.02938e-15	4.65164e-14
CARD14	5.06379	10.613	2.50021	4.06062e-15	4.68499e-14
C10orf2	7.58246	10.6066	1.25348	4.1551e-15	4.78568e-14
ALS2CL	9.09301	-10.6053	-1.77059	4.17409e-15	4.802e-14
LRRC20	8.63526	10.604	1.00721	4.1932e-15	4.82121e-14
TBX15	5.06354	10.6025	2.80482	4.21667e-15	4.8454e-14
PRKCQ	7.15691	-10.6017	-1.89666	4.22832e-15	4.85599e-14
RASGRF1	8.6658	-10.5865	-3.28918	4.46664e-15	5.1179e-14
SYNC	7.92717	-10.5726	-1.83654	4.6948e-15	5.37006e-14
PC	8.51399	10.5646	1.52311	4.83278e-15	5.5184e-14
ARHGEF37	7.884	-10.5574	-1.64249	4.96032e-15	5.65431e-14
RYR2	5.99334	-10.5557	-1.81438	4.99119e-15	5.68625e-14
ALDH1B1	9.28717	10.5551	1.19886	5.00113e-15	5.69107e-14
HOXA5	6.5762	-10.5542	-1.59871	5.01719e-15	5.70609e-14
EPHB6	7.17781	-10.5507	-1.69283	5.08047e-15	5.77476e-14
SRPX	8.25601	-10.5504	-1.83279	5.08576e-15	5.77749e-14
TBC1D2	10.4296	-10.55	-1.37332	5.09445e-15	5.78363e-14
GIPC2	6.21735	-10.5488	-2.33542	5.11589e-15	5.8018e-14
SCGB1A1	10.5031	-10.5425	-5.72838	5.2333e-15	5.92483e-14
ABCC3	10.594	10.5412	1.94237	5.25774e-15	5.94827e-14
CHRNB1	7.43039	10.5411	1.08414	5.25997e-15	5.94827e-14
TM6SF1	7.76723	-10.5406	-1.41233	5.26909e-15	5.95268e-14
NETO1	1.96071	10.5398	3.08992	5.28499e-15	5.96641e-14
C17orf103	8.84424	-10.5391	-1.22304	5.29796e-15	5.97429e-14
SGOL2	6.89156	10.5384	1.43149	5.31066e-15	5.98523e-14
VIP	1.79266	-10.5291	-1.69931	5.49175e-15	6.17536e-14
BAI3	4.28558	-10.5247	-2.37509	5.57983e-15	6.2638e-14
CABLES1	9.7156	-10.5236	-1.42237	5.60181e-15	6.28494e-14
GMNN	7.75755	10.5209	1.24927	5.65658e-15	6.34281e-14
CCDC21	8.25076	10.5203	1.01732	5.66995e-15	6.35423e-14
DISP1	8.64846	-10.52	-1.14391	5.67579e-15	6.3572e-14
DMBX1	1.68705	10.5192	2.86616	5.69215e-15	6.36838e-14
HYLS1	6.38736	10.5168	1.13732	5.74107e-15	6.41951e-14
SOCS2	9.38329	-10.5115	-2.09387	5.85311e-15	6.54111e-14
FAM83D	6.89753	10.5094	2.29204	5.89798e-15	6.58105e-14
PER1	11.3178	-10.5093	-1.45442	5.89875e-15	6.58105e-14
NRGN	9.16633	-10.5082	-2.42221	5.92172e-15	6.60299e-14
GRAMD2	8.8309	-10.5059	-2.19778	5.97162e-15	6.6549e-14
FAM181A	3.79844	-10.5049	-3.01867	5.99445e-15	6.67661e-14
ATP1B2	6.04226	-10.5002	-1.71486	6.09641e-15	6.77881e-14
LSAMP	7.20458	-10.4955	-1.4823	6.20119e-15	6.88764e-14
CLDN11	6.90274	-10.4896	-1.98741	6.33435e-15	7.0238e-14
SCARA5	6.85785	-10.4796	-3.52084	6.56673e-15	7.27339e-14
CENPH	6.58572	10.4784	1.42258	6.59567e-15	7.30138e-14
KRT27	2.40561	-10.4773	-2.29136	6.62243e-15	7.32694e-14
ROBO2	7.34766	-10.4713	-2.26343	6.76649e-15	7.47803e-14
VWA3A	4.41403	-10.4684	-3.34214	6.8369e-15	7.55165e-14
MAP3K8	8.75625	-10.4607	-1.34626	7.0309e-15	7.74876e-14
ST6GALNAC2	8.70828	-10.4534	-1.79306	7.21926e-15	7.92568e-14
SFTPA1	15.4405	-10.4506	-5.05958	7.29212e-15	8.00127e-14
BHLHA15	3.33517	10.4502	1.90646	7.30242e-15	8.00816e-14
C18orf56	2.56352	10.4499	1.94576	7.30978e-15	8.00903e-14
TNFSF11	3.02275	10.4499	2.78621	7.31125e-15	8.00903e-14
WDR62	6.13895	10.445	2.16589	7.44167e-15	8.14295e-14
HLF	8.83482	-10.4403	-2.57902	7.56934e-15	8.26904e-14
C8orf79	6.14733	-10.4353	-1.58336	7.70727e-15	8.4059e-14
FAT1	11.2485	10.4324	1.31833	7.78922e-15	8.49064e-14
LRRC19	2.48886	-10.4297	-1.93509	7.86386e-15	8.56731e-14
C8orf30A	8.82324	10.4245	1.00521	8.01386e-15	8.72596e-14
SELENBP1	12.0567	-10.4205	-2.2439	8.1316e-15	8.82524e-14
CDCA7	6.78811	10.4203	2.58614	8.13822e-15	8.82762e-14
FAM105A	10.0842	-10.4111	-1.77385	8.41206e-15	9.1197e-14
KRT16	3.68176	10.4082	4.55878	8.50188e-15	9.20706e-14
SERPING1	13.3302	-10.4028	-1.34408	8.66725e-15	9.37596e-14
CCRL2	7.96365	-10.4002	-1.70084	8.75049e-15	9.45575e-14
WFDC12	2.80855	-10.3881	-3.08315	9.14233e-15	9.85779e-14
PDE2A	7.54294	-10.3859	-1.82019	9.21549e-15	9.9313e-14
GJA4	8.04609	-10.3827	-1.36902	9.32299e-15	1.00412e-13
FKBP1B	6.94268	-10.3786	-1.55269	9.46322e-15	1.01653e-13
C17orf108	7.62714	-10.3768	-1.1446	9.5256e-15	1.02213e-13
LOC644165	4.53408	-10.3756	-1.88906	9.5671e-15	1.02493e-13
TMEM79	6.94321	10.372	1.14181	9.69298e-15	1.0373e-13
MAOB	9.28094	-10.371	-1.63185	9.7284e-15	1.04053e-13
PCDH12	9.29638	-10.3676	-1.49335	9.84911e-15	1.05288e-13
KREMEN2	2.46571	10.3645	2.05433	9.96002e-15	1.06384e-13
COL13A1	6.52304	-10.3644	-1.86524	9.96237e-15	1.06384e-13
CELA2B	1.15941	-10.36	-2.00439	1.0124e-14	1.07879e-13
FRK	6.52762	10.3547	1.24898	1.03195e-14	1.09845e-13
TLCD1	7.61928	10.3536	1.38877	1.03614e-14	1.10232e-13
TMED3	10.8789	10.3488	1.09857	1.05442e-14	1.12058e-13
KRT79	2.55864	-10.3438	-2.79747	1.07369e-14	1.14005e-13
FBN3	5.08303	-10.3437	-3.5427	1.07389e-14	1.14005e-13
ATOH8	9.54136	-10.3427	-3.01701	1.07788e-14	1.14307e-13
PHOSPHO1	4.07351	-10.3372	-1.94336	1.09972e-14	1.16499e-13
TMEM156	5.00661	10.3343	2.2415	1.11111e-14	1.17554e-13
SCN2B	5.49126	-10.3335	-2.05947	1.11444e-14	1.17808e-13
PCDH17	9.35719	-10.333	-1.48209	1.11636e-14	1.17949e-13
APOBEC3B	6.26981	10.3282	2.01337	1.13619e-14	1.19853e-13
ANXA8	7.6021	-10.3253	-3.5774	1.1479e-14	1.21024e-13
SEPP1	13.227	-10.3243	-1.91131	1.15219e-14	1.21412e-13
OR6K3	1.09968	-10.3201	-1.65913	1.1698e-14	1.23138e-13
?|729884	3.66542	10.3144	4.80023	1.19452e-14	1.25541e-13
PADI4	2.9572	-10.3138	-2.13056	1.19711e-14	1.25747e-13
TUBB6	10.8576	-10.3117	-1.20792	1.20609e-14	1.2649e-13
SLC15A2	9.53784	-10.3102	-2.18446	1.21273e-14	1.2712e-13
PVRL4	8.97198	10.3096	1.94381	1.21532e-14	1.2731e-13
ATAD5	5.74156	10.3095	1.57187	1.21582e-14	1.2731e-13
PLK4	6.19406	10.3088	1.90609	1.21907e-14	1.27583e-13
FAM184A	7.7607	-10.3067	-2.11906	1.22817e-14	1.28469e-13
PVRL1	9.21318	10.297	1.49808	1.27224e-14	1.32821e-13
ADHFE1	6.03511	-10.2917	-1.93291	1.2969e-14	1.35231e-13
C20orf24	10.5595	10.2854	1.11696	1.32708e-14	1.38307e-13
SIX4	7.19585	10.2779	2.07158	1.3639e-14	1.42069e-13
CADM1	11.4638	-10.2713	-1.75411	1.39705e-14	1.45294e-13
LOC344595	6.67307	-10.2688	-1.33824	1.40938e-14	1.46501e-13
SLC9A3R2	11.3649	-10.2656	-1.15044	1.42609e-14	1.48083e-13
PLAGL1	8.73182	-10.2642	-1.40491	1.43345e-14	1.4877e-13
ALPK2	3.79116	10.2639	2.78641	1.43474e-14	1.48827e-13
GOLGA7B	7.019	10.2636	2.25415	1.43633e-14	1.48914e-13
NTNG1	5.70983	-10.2551	-2.82848	1.48145e-14	1.53353e-13
GPR87	4.74414	10.2529	4.10091	1.49349e-14	1.54367e-13
TPPP	9.07487	-10.2529	-2.49186	1.49358e-14	1.54367e-13
NTRK2	7.07992	-10.2514	-2.76275	1.50191e-14	1.55148e-13
EPHX3	7.11053	10.2504	1.87834	1.50695e-14	1.55508e-13
SIGLEC6	4.49981	-10.2499	-1.93338	1.50964e-14	1.55705e-13
CD83	9.7499	-10.2487	-1.71781	1.51676e-14	1.56358e-13
IL11	3.23982	10.2484	2.49256	1.51802e-14	1.56407e-13
DERL3	8.11299	10.2481	2.13262	1.51999e-14	1.56529e-13
CDKL1	5.41183	-10.2438	-1.70822	1.54377e-14	1.58896e-13
RAB17	9.07885	-10.2432	-1.01202	1.5469e-14	1.59136e-13
CCDC34	7.15398	10.2386	1.45338	1.57347e-14	1.61452e-13
ELMO1	9.1814	-10.2332	-1.2165	1.60476e-14	1.64494e-13
FAT4	8.94259	-10.2321	-1.47846	1.61105e-14	1.65018e-13
BEAN	5.4997	10.2277	2.66565	1.63676e-14	1.6743e-13
C1orf87	4.44388	-10.2259	-3.691	1.64796e-14	1.68489e-13
KANK4	6.47512	-10.2252	-2.3142	1.65168e-14	1.68783e-13
RSPO4	6.20716	-10.214	-2.80124	1.72072e-14	1.75658e-13
PKDCC	8.37623	-10.2134	-1.77787	1.7242e-14	1.75923e-13
ADAM28	7.46477	10.2113	2.17164	1.73796e-14	1.77236e-13
TYROBP	11.0851	-10.2094	-1.60825	1.74942e-14	1.78223e-13
ZEB1	9.55224	-10.2082	-1.23168	1.75743e-14	1.78947e-13
C21orf34	4.4939	-10.198	-1.91096	1.8238e-14	1.85516e-13
ALOX5AP	10.518	-10.195	-2.03982	1.84414e-14	1.87298e-13
SLC12A8	8.20897	10.1921	1.37515	1.86383e-14	1.89105e-13
TLL1	6.27925	-10.1898	-1.75875	1.8793e-14	1.90578e-13
AGTR2	6.85852	-10.1894	-4.47668	1.88223e-14	1.90778e-13
PPARG	8.90163	-10.1888	-2.06084	1.88624e-14	1.91087e-13
SELPLG	10.3597	-10.1871	-1.43353	1.89758e-14	1.92138e-13
LRRC18	3.82892	-10.1864	-2.7835	1.90279e-14	1.92568e-13
REPS2	9.14925	-10.1776	-1.33172	1.96444e-14	1.98505e-13
CABLES2	7.6793	10.177	1.10461	1.96923e-14	1.98788e-13
GMDS	7.8965	10.1768	1.32327	1.97065e-14	1.9883e-13
HPDL	3.35449	10.173	2.42397	1.9978e-14	2.01467e-13
GIMAP4	10.0417	-10.1717	-1.48003	2.0071e-14	2.02201e-13
CDH16	1.77689	-10.1547	-1.89648	2.13594e-14	2.14855e-13
TNR	2.44869	-10.1522	-2.85311	2.15575e-14	2.1669e-13
DUSP8	8.56066	-10.1521	-1.32205	2.15636e-14	2.1669e-13
SNX30	10.7839	-10.1495	-1.41181	2.17655e-14	2.18609e-13
C1orf186	5.09451	-10.1476	-1.97813	2.19168e-14	2.20017e-13
WFDC3	4.16998	10.1341	2.67393	2.30244e-14	2.3061e-13
C3orf54	5.60542	-10.1341	-1.37116	2.30298e-14	2.3061e-13
LOC339524	6.436	-10.1276	-1.4105	2.35786e-14	2.35633e-13
ALPP	5.24888	-10.1235	-3.4516	2.39318e-14	2.38923e-13
CSF3R	9.97029	-10.1147	-2.05142	2.47194e-14	2.46423e-13
RAD54B	5.65301	10.1135	1.61404	2.48239e-14	2.47087e-13
SLC9A7	5.57604	10.1114	1.77435	2.50131e-14	2.48845e-13
FHDC1	9.33719	-10.1076	-1.35917	2.53661e-14	2.52105e-13
SLC7A7	10.1602	-10.1049	-1.54918	2.56181e-14	2.54483e-13
C1orf220	2.24127	10.1047	1.50854	2.56351e-14	2.54525e-13
IL31RA	2.99059	10.1034	3.04626	2.57575e-14	2.55613e-13
ZNF107	7.48001	10.099	1.09446	2.61746e-14	2.59365e-13
DNMT3A	8.91585	10.0981	1.05186	2.626e-14	2.60082e-13
SYNGR3	4.23456	10.095	2.04294	2.65611e-14	2.62934e-13
HLX	8.06498	-10.0945	-1.21021	2.66109e-14	2.63296e-13
RGS13	4.80821	-10.0924	-1.96084	2.68156e-14	2.6519e-13
HHIPL2	3.40254	10.0919	4.50377	2.68666e-14	2.65562e-13
CST4	1.53925	10.0905	2.72288	2.70026e-14	2.66775e-13
LMOD1	9.36782	-10.0868	-1.65179	2.737e-14	2.70136e-13
PXMP4	9.97906	-10.0823	-1.4125	2.78231e-14	2.74378e-13
CCDC54	1.0768	-10.0823	-1.30995	2.78273e-14	2.74378e-13
CNKSR2	4.21466	-10.0811	-2.21726	2.79426e-14	2.75217e-13
IL1RL1	6.94634	-10.081	-3.51419	2.79537e-14	2.75217e-13
EPHX4	4.55465	10.0778	2.82959	2.82815e-14	2.78169e-13
LNX2	10.0207	-10.0738	-1.05249	2.86963e-14	2.8211e-13
ARNTL2	6.14179	10.0731	2.53671	2.87715e-14	2.8257e-13
GPD1L	10.6648	-10.0726	-1.23984	2.88319e-14	2.83024e-13
TPRG1	6.01535	-10.0721	-1.47465	2.88793e-14	2.83349e-13
XAGE2	3.47235	-10.0711	-3.34605	2.89825e-14	2.84083e-13
MYOCD	5.24483	-10.0699	-2.43041	2.91125e-14	2.85217e-13
SLC5A7	2.6221	-10.0692	-2.5947	2.91885e-14	2.85821e-13
LAMC3	8.92008	-10.069	-1.8941	2.92107e-14	2.85898e-13
C5orf56	6.76177	-10.0665	-1.09164	2.94729e-14	2.88322e-13
RAB40A	3.87491	-10.0661	-1.75202	2.95227e-14	2.88668e-13
SFRP5	5.30044	-10.0644	-3.21109	2.96998e-14	2.90257e-13
KIAA1524	6.22614	10.0595	1.874	3.02394e-14	2.95097e-13
GBA3	2.45744	-10.0561	-2.32847	3.06171e-14	2.98491e-13
KLF2	9.54566	-10.0512	-1.74967	3.11739e-14	3.03473e-13
GAB2	10.3218	-10.0502	-1.11183	3.12837e-14	3.04394e-13
ENPP6	3.54454	-10.0481	-1.53728	3.15302e-14	3.06493e-13
FAM72A	3.44524	10.0433	2.05598	3.20855e-14	3.1174e-13
PTGDS	10.8278	-10.0428	-1.93446	3.21463e-14	3.12025e-13
GJC2	5.62211	-10.0423	-1.64382	3.22108e-14	3.12499e-13
GBP7	1.57931	-10.0416	-1.5448	3.22903e-14	3.13119e-13
FAR2	7.0112	-10.0381	-1.60613	3.27077e-14	3.16858e-13
SYNE1	11.2724	-10.0363	-1.54209	3.29177e-14	3.18428e-13
HSPB7	7.06116	-10.0354	-1.64571	3.30261e-14	3.19321e-13
UNC13B	11.3546	-10.029	-1.42424	3.38114e-14	3.2644e-13
SCD5	9.0635	-10.0285	-1.9193	3.38808e-14	3.26951e-13
GGTA1	8.0323	-10.0231	-1.50229	3.45573e-14	3.32835e-13
BRSK1	4.51108	10.0196	2.31018	3.49923e-14	3.36862e-13
C6orf222	2.12893	10.0183	2.91158	3.51621e-14	3.38007e-13
TM7SF4	5.42548	-10.0129	-2.44084	3.58676e-14	3.44291e-13
BARD1	6.00107	10.01	1.23581	3.62577e-14	3.47701e-13
EML5	5.16645	-10.0075	-1.19182	3.65888e-14	3.50707e-13
NCRNA00087	5.65737	-10.0052	-1.13987	3.68912e-14	3.53435e-13
LOC285629	2.71093	10.0014	2.58508	3.74173e-14	3.58132e-13
GFRA2	5.29733	-9.99567	-1.8022	3.8206e-14	3.65505e-13
COLEC12	10.3484	-9.99335	-1.81587	3.85323e-14	3.6845e-13
GPC5	4.6498	-9.99247	-2.76711	3.86571e-14	3.69385e-13
FAM167A	8.65445	-9.9924	-2.34006	3.86671e-14	3.69385e-13
C10orf25	6.22786	-9.98723	-1.2262	3.94063e-14	3.75726e-13
HBM	0.792076	-9.98449	-1.25863	3.98048e-14	3.79314e-13
CMTM1	6.53601	9.98046	1.11121	4.0397e-14	3.84254e-13
OVOL1	5.60743	9.97998	1.99796	4.04678e-14	3.84723e-13
MAP7D2	5.02144	9.97985	3.25849	4.04875e-14	3.84723e-13
ZNF423	6.90672	-9.97974	-1.67062	4.05042e-14	3.84723e-13
SSR4	11.7258	9.97941	1.14888	4.05527e-14	3.85e-13
CD160	4.01695	-9.97753	-1.52649	4.08336e-14	3.87482e-13
ZDHHC19	2.19236	-9.97002	-2.0296	4.1974e-14	3.97735e-13
RPL39L	6.77843	9.9621	2.03659	4.32106e-14	4.09065e-13
EIF4E3	9.76022	-9.96077	-1.01399	4.34221e-14	4.10677e-13
DDX11	8.05977	9.96051	1.42754	4.34643e-14	4.10881e-13
MS4A14	5.94415	-9.95825	-1.94211	4.38255e-14	4.14099e-13
BMP2	9.56625	-9.95686	-1.97922	4.40503e-14	4.16026e-13
FPR1	8.89314	-9.95439	-1.52359	4.44511e-14	4.19612e-13
MTP18	8.0662	9.95351	1.06856	4.45951e-14	4.20773e-13
FUT3	8.0136	9.94951	1.84896	4.52541e-14	4.26385e-13
PACSIN1	4.00643	9.94932	2.23956	4.52867e-14	4.26491e-13
SFTA1P	8.58975	-9.94648	-2.92114	4.57613e-14	4.30757e-13
TMEM220	7.04935	-9.946	-1.60609	4.58419e-14	4.31312e-13
COL5A1	11.4495	9.94469	2.19599	4.60625e-14	4.3297e-13
CPXM1	6.72963	9.94457	2.90263	4.60833e-14	4.3297e-13
KCNK17	5.31426	-9.93979	-2.01727	4.68993e-14	4.4036e-13
SFTPA2	16.4531	-9.9397	-4.86241	4.6914e-14	4.4036e-13
TLR4	9.64923	-9.93796	-1.43872	4.72139e-14	4.42966e-13
SOBP	7.08318	-9.93736	-1.63564	4.73185e-14	4.43739e-13
CITED2	11.6323	-9.93353	-1.19296	4.79895e-14	4.49065e-13
CSF3	5.71045	-9.93347	-4.07295	4.79991e-14	4.49065e-13
FAM55C	9.12707	-9.93186	-1.03639	4.82836e-14	4.50886e-13
B4GALNT4	4.07421	9.93023	3.65872	4.85746e-14	4.53385e-13
SAMD5	7.4561	-9.92654	-1.73117	4.92366e-14	4.59063e-13
DHDPSL	3.76164	-9.92646	-1.82222	4.92519e-14	4.59063e-13
YPEL4	4.63741	-9.92018	-1.29001	5.04013e-14	4.69557e-13
C1orf38	10.3852	-9.92004	-1.04583	5.04265e-14	4.69572e-13
PCNA	10.2977	9.9187	1.04637	5.06747e-14	4.71663e-13
DHCR24	14.1414	-9.91803	-1.13613	5.08e-14	4.72608e-13
FLJ34503	1.47801	-9.91117	-1.68037	5.20972e-14	4.83999e-13
DNAJB4	8.84865	-9.91033	-1.20706	5.22574e-14	4.85027e-13
EPB41L2	10.5254	-9.90816	-1.24672	5.26771e-14	4.88476e-13
KCTD12	12.0118	-9.90741	-1.21562	5.28224e-14	4.89595e-13
CHST15	10.1688	9.90663	1.04767	5.29732e-14	4.90703e-13
C1QA	12.569	-9.90558	-1.84092	5.31776e-14	4.92201e-13
ONECUT2	3.19404	9.90531	3.02109	5.32307e-14	4.92464e-13
TIMP3	14.1969	-9.89754	-1.70885	5.47726e-14	5.06494e-13
MC1R	6.51958	9.89704	1.71025	5.48748e-14	5.07204e-13
FADS3	8.92273	-9.89235	-1.01504	5.58288e-14	5.15783e-13
FOSB	11.1621	-9.88727	-3.68831	5.68807e-14	5.24771e-13
FLVCR1	6.89935	9.88315	1.10833	5.775e-14	5.31684e-13
CARD16	8.31555	-9.88265	-1.51161	5.78549e-14	5.32281e-13
CCR8	3.00956	9.87585	1.69335	5.93208e-14	5.44574e-13
SLC6A16	4.63952	-9.87582	-1.7741	5.93277e-14	5.44574e-13
DDX12	5.21142	9.87517	1.36355	5.94699e-14	5.45629e-13
NKAPL	3.66566	-9.87321	-1.6037	5.98986e-14	5.49309e-13
ARMCX1	8.49623	-9.86361	-1.03553	6.20517e-14	5.66968e-13
TNFRSF18	5.50505	9.86222	2.30806	6.23715e-14	5.69629e-13
FAM72B	5.6992	9.85618	2.0301	6.37734e-14	5.82166e-13
LRRC4B	5.49559	-9.85564	-1.65337	6.38989e-14	5.83045e-13
KCNJ5	6.80012	-9.85496	-2.16819	6.40604e-14	5.84251e-13
ARHGAP18	10.5933	-9.85445	-1.01344	6.41808e-14	5.85081e-13
C1orf168	4.76787	-9.85089	-2.86797	6.50264e-14	5.92519e-13
DIO2	6.45535	9.84537	2.53063	6.63609e-14	6.04126e-13
MYH10	11.7663	-9.8437	-1.42868	6.67709e-14	6.07582e-13
LHFPL5	0.961886	9.84037	1.65481	6.75941e-14	6.14293e-13
LINGO1	5.16976	9.84017	2.09654	6.76445e-14	6.14409e-13
SSTR4	0.756991	-9.83198	-1.15181	6.97145e-14	6.32635e-13
SLC17A9	6.91087	9.82963	1.76187	7.03209e-14	6.37847e-13
PLAU	10.4158	9.82632	2.40653	7.11837e-14	6.45086e-13
TSPAN4	10.5682	-9.82524	-1.10273	7.14664e-14	6.47354e-13
CDK5R1	6.29308	9.81874	1.72419	7.32004e-14	6.61558e-13
SPDEF	7.61817	9.81857	2.73531	7.32449e-14	6.6166e-13
TPSB2	10.3974	-9.81062	-2.14344	7.54215e-14	6.80397e-13
SULF1	10.2621	9.80894	2.51748	7.58901e-14	6.84316e-13
PKIG	10.0081	-9.80348	-1.29304	7.74345e-14	6.97611e-13
SYNPO2	9.28967	-9.80234	-1.76441	7.77588e-14	6.999e-13
INCENP	8.14311	9.80145	1.21048	7.80146e-14	7.01885e-13
C4orf31	11.0444	-9.79865	-2.43139	7.88256e-14	7.08861e-13
ARHGEF10	9.7035	-9.7936	-1.08839	8.03059e-14	7.21198e-13
TXNDC17	9.64225	9.79255	1.30326	8.06155e-14	7.23001e-13
SMPDL3B	9.21214	9.78784	1.59294	8.20277e-14	7.34674e-13
ITGA11	7.61997	9.78739	3.19787	8.21643e-14	7.35568e-13
ITLN1	4.71036	-9.78672	-4.49096	8.23671e-14	7.37053e-13
CASS4	7.61892	-9.78395	-1.68829	8.32148e-14	7.43971e-13
WISP2	8.43628	-9.78157	-2.2776	8.39482e-14	7.50191e-13
SLC15A3	10.3996	-9.78047	-1.51008	8.4289e-14	7.52898e-13
KAZ	8.46068	-9.77927	-1.54818	8.46641e-14	7.55572e-13
C10orf107	4.91	-9.7776	-2.65913	8.51853e-14	7.59883e-13
KBTBD10	4.32564	-9.77352	-1.94046	8.64783e-14	7.69418e-13
ZNF138	6.93497	9.77338	1.00116	8.65213e-14	7.69418e-13
CCL14	8.56754	-9.77144	-2.54246	8.71442e-14	7.74585e-13
H2AFX	9.08886	9.77074	1.10126	8.73686e-14	7.76234e-13
FAM167B	6.96543	-9.76683	-1.40058	8.86397e-14	7.86826e-13
FRAS1	8.72992	-9.76536	-2.14114	8.91215e-14	7.90398e-13
ZPLD1	1.56366	9.75684	2.20313	9.19655e-14	8.13811e-13
MCM8	7.18493	9.75302	1.3079	9.32726e-14	8.24646e-13
MLC1	4.91867	-9.75208	-1.99986	9.35967e-14	8.27144e-13
FLJ42875	4.56118	-9.75189	-2.22708	9.36641e-14	8.27293e-13
NR4A1	11.8205	-9.75125	-2.25628	9.38842e-14	8.28583e-13
C7orf45	0.782083	-9.7486	-1.08941	9.48069e-14	8.36149e-13
PHLDA2	7.59708	9.74855	2.26987	9.48253e-14	8.36149e-13
JUND	11.7627	-9.74821	-1.44771	9.49429e-14	8.36816e-13
DNASE1	5.47436	9.74793	1.33297	9.50404e-14	8.37304e-13
ABLIM3	9.10043	-9.74758	-1.59072	9.51655e-14	8.38037e-13
ARHGAP23	10.123	-9.7473	-1.11209	9.52647e-14	8.3854e-13
MID1IP1	10.9082	-9.74569	-1.14578	9.5831e-14	8.43152e-13
FLT4	9.15539	-9.74466	-1.35752	9.61945e-14	8.45977e-13
PLA1A	7.246	-9.74409	-1.88979	9.64001e-14	8.47412e-13
CXCR1	5.26123	-9.7419	-2.30864	9.71798e-14	8.53889e-13
ATAD2	8.88291	9.73928	1.58405	9.81264e-14	8.61826e-13
C15orf48	8.04156	9.7384	2.77688	9.84451e-14	8.64245e-13
PRG4	7.88997	-9.73469	-3.41755	9.9805e-14	8.75027e-13
RAMP1	7.93021	9.73126	1.64673	1.01074e-13	8.85376e-13
HBG2	2.10628	-9.72909	-2.28666	1.01888e-13	8.92113e-13
CX3CR1	7.00155	-9.72576	-1.93849	1.0315e-13	9.01975e-13
HIF3A	7.80676	-9.72454	-2.44301	1.03615e-13	9.04853e-13
CAMK2N2	2.88236	9.72172	2.25471	1.04701e-13	9.13533e-13
ADCK5	6.71115	9.7183	1.18781	1.06032e-13	9.23937e-13
JMJD7-PLA2G4B	8.64159	-9.71336	-1.02652	1.07985e-13	9.40128e-13
NETO2	8.34574	9.71168	1.67878	1.08658e-13	9.45575e-13
PILRA	8.5351	-9.70212	-1.50747	1.12565e-13	9.77447e-13
MEIS1	8.48148	-9.70164	-1.15057	1.12764e-13	9.78746e-13
MEST	9.84272	9.70028	1.33243	1.13331e-13	9.83237e-13
MMP28	9.03644	-9.69804	-2.75366	1.14273e-13	9.9098e-13
COL29A1	7.06754	-9.69546	-1.85734	1.1537e-13	1.00006e-12
FLRT3	10.295	-9.69076	-2.54348	1.17392e-13	1.01714e-12
APOL3	10.0933	-9.68908	-1.39786	1.18122e-13	1.02302e-12
MOBKL2B	8.82583	-9.68674	-1.06655	1.19151e-13	1.03103e-12
WNT2B	4.7648	-9.67905	-1.49068	1.22586e-13	1.05755e-12
LOC148709	2.3312	9.6751	2.12114	1.24392e-13	1.07035e-12
SYP	6.28558	-9.67392	-1.82167	1.24934e-13	1.07455e-12
DOCK11	9.54662	-9.67268	-1.42059	1.25509e-13	1.0781e-12
GALNT13	6.03327	-9.6677	-2.78423	1.27843e-13	1.09673e-12
GPR123	2.38118	-9.66496	-2.41043	1.29145e-13	1.10647e-12
FCRL4	1.65135	9.66052	1.94237	1.31286e-13	1.12385e-12
PRDM5	6.15724	-9.65472	-1.24953	1.34136e-13	1.14677e-12
LILRA1	4.12101	-9.65274	-1.48478	1.3512e-13	1.15419e-12
DUSP9	2.62073	9.64946	3.05398	1.36771e-13	1.16779e-12
WFDC1	7.17895	-9.64771	-2.05333	1.3766e-13	1.17489e-12
C1orf65	1.29486	9.64725	2.01464	1.37892e-13	1.17636e-12
VASH1	9.83525	-9.64638	-1.16423	1.38338e-13	1.17966e-12
C5orf4	9.99847	-9.64142	-1.69385	1.40901e-13	1.20049e-12
UPB1	3.046	-9.63686	-1.74855	1.433e-13	1.21936e-12
MFSD2A	10.2145	-9.63102	-2.01881	1.46432e-13	1.24389e-12
VSIG2	8.59598	-9.62731	-3.44843	1.48462e-13	1.25952e-12
INSC	2.94011	-9.62717	-2.27375	1.48538e-13	1.25964e-12
CYGB	8.95056	-9.62341	-1.13539	1.50617e-13	1.27564e-12
DRAM1	11.8323	-9.62214	-1.53921	1.51329e-13	1.28019e-12
TPSAB1	9.65401	-9.62016	-2.12458	1.52442e-13	1.2889e-12
ABCA6	7.25428	-9.61937	-1.72506	1.52892e-13	1.2919e-12
IFT57	11.0065	-9.61931	-1.26122	1.52926e-13	1.2919e-12
ITM2C	10.911	9.61246	1.12407	1.56856e-13	1.32118e-12
HECW1	3.22287	9.60921	2.20494	1.58752e-13	1.33593e-12
P2RX1	6.40947	-9.60912	-1.66274	1.58808e-13	1.33593e-12
IGFL2	2.60334	9.60765	3.14723	1.59673e-13	1.34264e-12
C12orf69	4.19604	-9.60393	-1.61389	1.61894e-13	1.35959e-12
NRN1L	2.82803	-9.60378	-1.70888	1.61981e-13	1.35976e-12
OLFML1	8.49036	-9.60274	-1.37551	1.62606e-13	1.36443e-12
WNT3	4.61723	9.60076	1.70757	1.63803e-13	1.37389e-12
COL4A4	9.22564	-9.59448	-2.17954	1.67661e-13	1.40507e-12
KCNJ15	9.76771	-9.58168	-1.98817	1.75814e-13	1.47092e-12
C15orf52	8.55964	-9.5794	-1.35975	1.77306e-13	1.48216e-12
ACY3	3.86257	9.57924	2.16058	1.77407e-13	1.48238e-12
C7orf10	4.4694	9.57805	2.07947	1.78191e-13	1.48831e-12
ZFP36	12.8847	-9.57616	-1.6382	1.79447e-13	1.49755e-12
SRD5A3	9.63838	9.57237	1.46576	1.8199e-13	1.51813e-12
TMEM132A	8.99908	9.56768	1.85812	1.85181e-13	1.54152e-12
TLL2	2.56179	9.56719	2.21962	1.85518e-13	1.54369e-12
RTN1	7.79527	-9.55781	-1.79701	1.92086e-13	1.59634e-12
CEP72	6.1025	9.55677	1.23351	1.9283e-13	1.60119e-12
SLCO4C1	8.56979	-9.55569	-2.29646	1.93601e-13	1.60559e-12
ENTPD8	3.05105	9.55309	2.89515	1.95482e-13	1.61984e-12
DEPDC6	8.19857	9.55224	1.34069	1.96098e-13	1.62427e-12
ALDH1A1	11.1655	-9.55105	-2.25999	1.96968e-13	1.63026e-12
FIBIN	8.58702	-9.55101	-1.96213	1.96995e-13	1.63026e-12
MMP3	2.60939	9.54982	3.16939	1.97868e-13	1.6362e-12
XKR9	4.76284	9.54722	1.68931	1.99783e-13	1.65136e-12
GPR109A	8.12109	-9.54563	-2.17982	2.0097e-13	1.66048e-12
IDI1	10.5682	-9.54413	-1.04309	2.0209e-13	1.66835e-12
LOC100125556	5.41566	9.54121	1.30087	2.04293e-13	1.68584e-12
CLEC12A	6.91531	-9.52984	-2.35217	2.13102e-13	1.75563e-12
E2F7	4.67332	9.52888	2.29207	2.13863e-13	1.76117e-12
ADAMTS16	4.78268	9.52735	3.14813	2.15078e-13	1.77044e-12
NCRNA00162	2.20956	-9.52696	-2.19633	2.15396e-13	1.7715e-12
WFIKKN2	2.94887	-9.52687	-2.56653	2.15466e-13	1.7715e-12
C19orf48	8.86874	9.52686	1.09868	2.15473e-13	1.7715e-12
NET1	11.0538	9.52572	1.16135	2.16389e-13	1.77745e-12
STX2	8.67218	-9.52562	-1.0057	2.16464e-13	1.77745e-12
DSCC1	6.14917	9.52359	1.68793	2.18102e-13	1.78956e-12
FAM72D	4.75889	9.5213	2.08144	2.19968e-13	1.80319e-12
FAM95B1	4.60604	-9.52114	-1.79608	2.20096e-13	1.80319e-12
ABLIM1	11.8257	-9.52109	-1.23569	2.20142e-13	1.80319e-12
IL2RA	6.18893	9.51792	1.75795	2.22748e-13	1.82229e-12
LST1	8.57333	-9.51771	-1.65963	2.2292e-13	1.82295e-12
PRKDC	11.6306	9.51373	1.09377	2.26236e-13	1.84704e-12
DSP	11.5665	9.51275	1.99773	2.27062e-13	1.85302e-12
AADAC	6.03157	-9.51168	-3.39359	2.27968e-13	1.85966e-12
LRCH2	6.92536	-9.51131	-1.73003	2.28282e-13	1.86146e-12
GPR112	1.02448	-9.51003	-1.39135	2.2937e-13	1.86956e-12
C5orf23	8.62074	-9.5078	-1.92763	2.31283e-13	1.88361e-12
DSG2	11.3338	9.50204	1.39068	2.36284e-13	1.92199e-12
C1orf150	3.86505	-9.50171	-1.90726	2.3657e-13	1.92353e-12
PPARGC1B	4.75958	-9.49846	-1.45	2.39446e-13	1.94612e-12
CEACAM1	8.95559	9.4981	1.65601	2.39769e-13	1.94795e-12
IL1RL2	3.3547	9.4978	2.16763	2.40039e-13	1.94935e-12
DDIT4L	5.61381	9.497	2.15468	2.40749e-13	1.95432e-12
TRIP13	7.02542	9.49663	2.56111	2.41082e-13	1.95623e-12
COL22A1	3.69685	9.49459	2.47901	2.42917e-13	1.96871e-12
ACSM5	3.83089	-9.49088	-1.89069	2.46292e-13	1.99525e-12
GRID1	5.21299	-9.48644	-1.69922	2.50385e-13	2.02679e-12
FCGR3B	6.71133	-9.48644	-2.0061	2.50388e-13	2.02679e-12
LOC647946	1.95198	9.4792	2.1608	2.57216e-13	2.07789e-12
APH1B	8.83453	-9.4792	-1.00582	2.57221e-13	2.07789e-12
ODZ4	7.34057	9.47541	1.87454	2.60867e-13	2.10563e-12
MRM1	6.52399	9.47415	1.00823	2.62098e-13	2.11471e-12
CENPM	6.05863	9.47162	1.86921	2.64566e-13	2.13376e-12
GGTLC2	6.89399	-9.46674	-1.60655	2.69416e-13	2.17112e-12
CA1	1.72099	-9.46467	-2.19501	2.71499e-13	2.18614e-12
KIAA1274	8.86136	-9.46213	-1.22877	2.74071e-13	2.20507e-12
MMP17	5.27257	9.45739	1.93949	2.78955e-13	2.24255e-12
LRRC8C	9.27943	-9.45711	-1.06026	2.79243e-13	2.24396e-12
GYLTL1B	7.6737	9.45613	1.7457	2.80262e-13	2.25034e-12
BEND6	4.76612	9.44797	1.81207	2.88905e-13	2.31778e-12
OR7E37P	1.31739	-9.44795	-1.61763	2.88924e-13	2.31778e-12
KCNAB2	9.31087	-9.44744	-1.31138	2.89473e-13	2.32056e-12
CHTF18	6.97741	9.44482	1.28884	2.92311e-13	2.34142e-12
ABCB6	8.46261	9.44305	1.4403	2.94242e-13	2.35594e-12
KIAA0907	9.08771	9.44176	1.01238	2.95651e-13	2.36628e-12
KRT86	3.99557	9.44074	2.28815	2.9678e-13	2.37436e-12
AQP1	13.8161	-9.44045	-2.31644	2.97099e-13	2.37596e-12
GSG2	4.72712	9.43853	1.67839	2.99229e-13	2.39203e-12
SLC16A5	8.97245	-9.43803	-1.37069	2.99787e-13	2.39553e-12
TBC1D4	9.47166	-9.43151	-1.08786	3.07155e-13	2.45244e-12
CD68	13.0048	-9.43086	-1.37998	3.079e-13	2.45642e-12
TBX5	8.11352	-9.42962	-1.36588	3.09325e-13	2.46681e-12
CDH1	12.7032	9.42676	1.07614	3.12637e-13	2.49222e-12
CPNE7	4.57176	9.42532	2.33399	3.14309e-13	2.50455e-12
KIF4B	2.43616	9.42421	1.6426	3.15619e-13	2.51399e-12
FILIP1	8.21976	-9.42388	-1.78667	3.16001e-13	2.51602e-12
SLC29A4	6.82856	9.42142	2.22999	3.18912e-13	2.53717e-12
SLCO2A1	11.0073	-9.42017	-1.88531	3.20395e-13	2.54795e-12
KLF15	7.4992	-9.40516	-2.22245	3.38824e-13	2.69236e-12
PLP1	2.21608	-9.40408	-2.01424	3.40186e-13	2.70211e-12
PPAPDC1A	2.84998	9.40005	3.22289	3.45337e-13	2.74193e-12
C19orf76	4.56374	-9.39839	-1.29161	3.47469e-13	2.75776e-12
CWH43	3.03674	-9.39758	-2.95199	3.48523e-13	2.76502e-12
C1QB	12.7592	-9.39608	-1.85931	3.50473e-13	2.77939e-12
PCYT1B	4.90231	-9.39512	-2.28303	3.51735e-13	2.78828e-12
CDHR3	7.13318	-9.39418	-3.33545	3.52972e-13	2.79587e-12
VIT	2.11735	-9.37801	-1.97734	3.74896e-13	2.96012e-12
TMEM47	9.58456	-9.37429	-1.45534	3.80131e-13	2.99789e-12
PDE3B	8.55894	-9.37344	-1.36043	3.81334e-13	3.00619e-12
MGC12982	5.50757	9.37271	1.28281	3.82371e-13	3.01317e-12
AKAP13	12.414	-9.37158	-1.0423	3.8398e-13	3.02466e-12
VTN	4.8498	-9.37142	-2.07423	3.84215e-13	3.02531e-12
CLCN2	5.91783	9.3702	1.23647	3.85972e-13	3.03782e-12
C7orf23	9.39982	-9.36935	-1.11054	3.87197e-13	3.04519e-12
KIF20B	7.43408	9.36465	1.30362	3.94037e-13	3.09654e-12
NR0B2	5.20491	-9.35929	-2.95627	4.01995e-13	3.15286e-12
AFF2	6.03567	-9.35619	-2.08692	4.06669e-13	3.18826e-12
TCAP	2.90127	-9.3534	-1.41848	4.10925e-13	3.22037e-12
AXIN2	8.90387	-9.35191	-1.29561	4.1321e-13	3.237e-12
GPC2	3.18827	9.34906	2.26386	4.17627e-13	3.27032e-12
LEFTY2	4.86177	-9.34681	-2.46004	4.21144e-13	3.29527e-12
GUCA2A	1.90991	-9.34623	-2.22881	4.22057e-13	3.30111e-12
PLXNB3	6.52345	9.34504	2.7637	4.23936e-13	3.31321e-12
FANCB	3.50575	9.34331	1.59626	4.26685e-13	3.33209e-12
LOC150622	3.19419	-9.34293	-2.59971	4.27288e-13	3.33418e-12
MATK	6.76399	-9.34072	-1.37052	4.30827e-13	3.36049e-12
KCTD16	4.16735	-9.34047	-1.48249	4.31234e-13	3.36234e-12
RGS6	3.61716	-9.33981	-2.37989	4.32295e-13	3.3693e-12
C20orf151	4.89413	9.33808	1.76207	4.3509e-13	3.38843e-12
RAET1K	1.60803	9.33764	1.56308	4.35804e-13	3.39267e-12
CTSW	7.82418	-9.33609	-1.46598	4.38333e-13	3.41102e-12
FAM66C	4.01427	-9.33261	-1.19364	4.44063e-13	3.45292e-12
PACRG	4.20892	-9.33221	-2.7545	4.44722e-13	3.4567e-12
HMGCS1	10.8533	-9.33207	-1.07857	4.44961e-13	3.45721e-12
C22orf34	2.87698	-9.33115	-1.23785	4.46496e-13	3.46778e-12
EXOSC5	7.98304	9.33017	1.05767	4.48127e-13	3.47909e-12
TNNT3	2.22889	-9.32868	-2.38195	4.50625e-13	3.49712e-12
METTL7B	6.66392	9.32729	1.87723	4.52965e-13	3.51392e-12
COL7A1	5.6006	9.32292	2.86233	4.60418e-13	3.57034e-12
FNDC1	8.12542	9.31843	2.74139	4.68199e-13	3.62786e-12
SLC8A3	3.91789	-9.31456	-1.55252	4.75015e-13	3.67781e-12
MMP9	9.16396	9.31257	2.58514	4.78561e-13	3.70096e-12
TRPM8	2.68337	9.30643	3.62349	4.89659e-13	3.78385e-12
ARRDC4	9.373	-9.30622	-1.36521	4.90044e-13	3.78536e-12
GFI1B	2.28483	-9.30362	-1.7807	4.94809e-13	3.82068e-12
UBASH3B	8.86035	-9.30103	-1.57153	4.99626e-13	3.85489e-12
GNMT	3.61101	-9.29757	-1.84244	5.06122e-13	3.89747e-12
CHI3L2	8.6595	-9.29712	-2.36261	5.06984e-13	3.90258e-12
ARHGAP11B	3.33937	9.28936	1.79197	5.21887e-13	4.01043e-12
GREB1L	2.96391	9.2893	2.65209	5.21997e-13	4.01043e-12
LDB3	5.19663	-9.28725	-1.90647	5.2601e-13	4.03659e-12
ST6GALNAC5	8.20874	-9.28282	-2.11824	5.3479e-13	4.10081e-12
DBF4B	6.47623	9.28027	1.14276	5.39914e-13	4.13665e-12
IL4I1	7.30599	9.27826	1.82855	5.43994e-13	4.16498e-12
DTL	7.14144	9.27559	2.13339	5.49446e-13	4.20349e-12
GPR19	3.13405	9.27291	1.83069	5.54972e-13	4.24414e-12
FCRL5	6.11628	9.27175	2.52919	5.5739e-13	4.261e-12
LAPTM4B	11.9203	9.27038	1.18285	5.60242e-13	4.27952e-12
CLDN14	2.12009	9.2677	1.69051	5.6589e-13	4.3177e-12
SYDE2	7.03355	-9.26274	-1.34965	5.76466e-13	4.39503e-12
TMEM63C	4.85245	9.26192	3.00271	5.78233e-13	4.40513e-12
DLL3	2.00029	9.26056	3.27141	5.8118e-13	4.42589e-12
SLC4A1	2.40108	-9.25848	-2.06221	5.85725e-13	4.4588e-12
DTX4	10.521	-9.25802	-1.01537	5.86741e-13	4.46483e-12
CDKL5	5.88283	-9.25777	-1.23358	5.87293e-13	4.46732e-12
BTK	8.64477	-9.25612	-1.60998	5.90913e-13	4.49314e-12
ETS2	12.1682	-9.25566	-1.0561	5.91932e-13	4.49918e-12
C15orf51	2.34105	-9.25177	-1.43636	6.00608e-13	4.55991e-12
NAP1L5	6.75514	-9.25143	-1.03932	6.01376e-13	4.564e-12
NAALAD2	4.51535	-9.24937	-1.51202	6.06026e-13	4.59214e-12
CAD	9.77493	9.24795	1.04644	6.09238e-13	4.61314e-12
SASS6	6.5276	9.2473	1.1718	6.10732e-13	4.62269e-12
MYOZ3	4.46016	-9.24566	-1.70342	6.14483e-13	4.64797e-12
IL17RE	8.6013	-9.24564	-1.40959	6.14538e-13	4.64797e-12
UNC13D	10.4843	-9.24492	-1.37558	6.16191e-13	4.6587e-12
NRG1	5.72526	-9.22571	-1.92197	6.62101e-13	4.99067e-12
CD33	7.41297	-9.22233	-1.58225	6.70525e-13	5.05097e-12
MPDZ	9.10088	-9.2223	-1.09595	6.70608e-13	5.05097e-12
TNS3	12.2364	-9.21284	-1.01214	6.9477e-13	5.23097e-12
DCDC2	6.9666	-9.20999	-2.42447	7.02205e-13	5.28098e-12
SCAMP5	7.71472	9.20962	1.25629	7.03192e-13	5.28641e-12
ITIH3	4.86493	-9.20405	-1.73434	7.17993e-13	5.39563e-12
RNF112	3.82158	-9.20222	-1.28852	7.22932e-13	5.42866e-12
OTUB2	6.09501	9.20193	1.12713	7.2371e-13	5.43246e-12
MFAP2	8.50686	9.20073	1.70809	7.26988e-13	5.45091e-12
GSTA3	2.53706	-9.19835	-2.79302	7.33474e-13	5.49541e-12
MAPK10	6.82827	-9.19501	-1.78639	7.4271e-13	5.56042e-12
CCDC64	7.21445	9.19121	1.59856	7.53366e-13	5.63597e-12
ZP3	6.56582	9.1901	1.4432	7.5649e-13	5.65722e-12
PFKFB2	10.099	-9.18421	-1.01522	7.73357e-13	5.77469e-12
SOX18	7.65252	-9.18382	-1.48999	7.74506e-13	5.77731e-12
ARL9	2.02075	9.18379	2.13317	7.74577e-13	5.77731e-12
KLF17	2.77859	-9.18185	-1.67729	7.80228e-13	5.81511e-12
KIAA1383	6.24302	9.18159	1.24805	7.80997e-13	5.81866e-12
CKAP2	8.53212	9.18094	1.07919	7.82889e-13	5.83058e-12
RGS22	5.09639	-9.18025	-2.53892	7.84925e-13	5.84356e-12
C15orf26	3.48808	-9.17511	-2.58599	8.00181e-13	5.95269e-12
GREB1	5.62819	9.17313	1.90185	8.06137e-13	5.99029e-12
GRM3	1.75949	-9.17297	-1.45973	8.06625e-13	5.99168e-12
C17orf87	6.22144	-9.17236	-1.66299	8.08457e-13	6.00306e-12
B3GNT6	3.72052	9.17156	3.91523	8.10885e-13	6.01819e-12
C14orf49	5.63132	-9.17112	-1.51153	8.12225e-13	6.0243e-12
BARX2	4.9442	9.16782	3.30488	8.22335e-13	6.09702e-12
PHLDB2	9.74403	-9.16356	-1.53425	8.35561e-13	6.18129e-12
DTX2	9.33782	9.16189	1.15161	8.40823e-13	6.21561e-12
ZNF331	9.48346	-9.15983	-1.22099	8.47323e-13	6.26096e-12
DOK5	4.34248	9.15975	2.13688	8.47586e-13	6.26096e-12
C13orf38	2.17478	9.158	2.12708	8.53174e-13	6.29757e-12
GUCY1A2	5.44716	-9.157	-1.412	8.56358e-13	6.31873e-12
LOXL1	8.56782	9.15664	1.27901	8.57535e-13	6.32508e-12
IGDCC4	5.42122	9.15627	1.56428	8.58697e-13	6.3313e-12
ABCC6	8.53716	-9.15413	-1.58841	8.6562e-13	6.37763e-12
C3orf42	3.98863	-9.15255	-1.01313	8.70769e-13	6.41083e-12
[truncated: 2,224 more rows]
